# Supplementary material for: An Evaluation of Machine Learning Categories for Diabetes Prediction and Detection in Libya: A Comparative Study
Source: Research Square preprint supplement (doi:10.21203/rs.3.rs-7687597/v1), 2025-09-30
Supplement: Supplementary file 1 [file 6b93a07c1b737150c761ddb2.xlsx]

## Sheet: دراسة عن مرض السكري
Class	ID	Year of birth	Age	Sex	g_code	no.children	just-w	hight	hight2	Wight	BMI1	BMI	Glucose	Blood pressure	Father	Mother	Siblings	GROUND PARENTS	Unclele & Aunt (M)	Unclele & Aunt2 (F)	No	Number of siblings	DPF	Mother (Birtday)
No	1	1995	28	2	1		0.5	161	1.61	61	23.533	23.53	70	60	0	0	0	0	0	0	1		0	1970
No	3	1970	53	2	1	3	1.4	163	1.63	70	26.3465	26.35	70	70	0	0	0	0	0	0	1		0	1950
No	5	2007	18	1	0		0	168	1.68	52	18.424	18.42	80	60	0	0	0	0	0	0	1		0	1972
Yes	14	1969	54	2	1	2	1.1	165	1.65	92	33.7925	33.79	200	70	0	0	0	0	0	0	1		0	1940
No	32	1967	56	2	1	0	0.5	164	1.64	57	21.1927	21.19	60	60	0	0	0	0	0	0	1		0
Yes	35	1967	56	2	1	7	2.6	170	1.7	115	39.7924	39.79	200	60	0	0	0	0	0	0	1		0	1944
No	37	1961	62	1	0		0	178	1.78	85	26.8274	26.83	80	75	0	0	0	0	0	0	1		0	1938
No	38	1999	24	1	0		0	176	1.76	70	22.5981	22.6	75	60	0	0	0	0	0	0	1		0	1970
No	39	2001	22	1	0		0	180	1.8	65	20.0617	20.06	75	60	0	0	0	0	0	0	1		0	1970
No	64	2003	20	1	0		0	170	1.7	65	22.4913	22.49	70	60	0	0	0	0	0	0	1		0	1972
No	67	2003	20	1	0		0	165	1.65	61	22.4059	22.41	70	80	0	0	0	0	0	0	1		0	1976
Yes	68	1976	47	1	0		0	179	1.79	72	22.4712	22.47	80	70	0	0	0	0	0	0	1		0	1956
No	73	1993	30	1	0		0	180	1.8	80	24.6914	24.69	80	70	0	0	0	0	0	0	1		0	1964
No	74	1999	24	2	1	1	0.8	158	1.58	58	23.2335	23.23	80	60	0	0	0	0	0	0	1		0	1975
No	79	1985	38	2	1	1	0.8	163	1.63	57	21.4536	21.45	90	139	0	0	0	0	0	0	1		0	1959
No	80	1972	51	2	1	3	1.4	168	1.68	70	24.8016	24.8	75	70	0	0	0	0	0	0	1		0	1949
No	81	2001	22	2	1		0.5	165	1.65	49	17.9982	18	70	60	0	0	0	0	0	0	1		0	1972
Yes	85	1969	54	2	1	6	2.3	168	1.68	70	24.8016	24.8	200	70	0	0	0	0	0	0	1		0
Yes	86	1952	71	2	1	8	2.9	166	1.66	90	32.6608	32.66	200	70	0	0	0	0	0	0	1		0	1929
No	91	1989	34	2	1		0.5	166	1.66	59	21.4109	21.41	75	90	0	0	0	0	0	0	1		0	1961
No	110	1995	28	2	1		0.5	171	1.71	70	23.939	23.94	75	60	0	0	0	0	0	0	1		0	1972
No	112	1995	28	1	0		0	178	1.78	85	26.8274	26.83	78	70	0	0	0	0	0	0	1		0	1960
No	113	1993	30	1	0		0	185	1.85	88	25.7122	25.71	79	75	0	0	0	0	0	0	1		0	1947
No	114	1987	36	1	0		0	168	1.68	67	23.7387	23.74	78	65	0	0	0	0	0	0	1		0	1950
No	119	1990	33	1	0		0	172	1.72	95	32.112	32.11	70	90	0	0	0	0	0	0	1		0
No	128	1990	33	1	0		0	170	1.7	72	24.9135	24.91	70	60	0	0	0	0	0	0	1		0
No	129	1989	34	1	0		0	173	1.73	77	25.7276	25.73	70	70	0	0	0	0	0	0	1		0
No	130	1972	51	1	0		0	173	1.73	74	24.7252	24.73	70	70	0	0	0	0	0	0	1		0
No	134	1966	57	1	0		0	183	1.83	94	28.0689	28.07	70	82	0	0	0	0	0	0	1		0
No	137	1989	34	1	0		0	180	1.8	98	30.2469	30.25	75	90	0	0	0	0	0	0	1		0
No	138	1985	38	1	0		0	175	1.75	85	27.7551	27.76	70	90	0	0	0	0	0	0	1		0
No	140	1982	41	1	0		0	150	1.5	85	37.7778	37.78	75	100	0	0	0	0	0	0	1		0
No	141	1977	46	2	1		0.5	165	1.65	75	27.5482	27.55	60	80	0	0	0	0	0	0	1		0
No	145	1988	35	2	1	1	0.8	163	1.63	67	25.2174	25.22	70	80	0	0	0	0	0	0	1		0
No	147	1997	26	2	1	1	0.8	159	1.59	68	26.8977	26.9	65	70	0	0	0	0	0	0	1		0
No	151	1980	43	2	1	1	0.8	165	1.65	125	45.9137	45.91	60	70	0	0	0	0	0	0	1		0
No	152	1980	43	1	0		0	182	1.82	93	28.0763	28.08	80	70	0	0	0	0	0	0	1		0
No	154	1980	43	2	1	1	0.8	159	1.59	60	23.7332	23.73	75	60	0	0	0	0	0	0	1		0
No	155	1986	37	2	1	1	0.8	159	1.59	60	23.7332	23.73	65	70	0	0	0	0	0	0	1		0
No	158	1988	35	1	0		0	180	1.8	112	34.5679	34.57	79	70	0	0	0	0	0	0	1		0
No	159	1978	45	1	0		0	165	1.65	65	23.8751	23.88	76	70	0	0	0	0	0	0	1		0
No	161	1989	34	1	0		0	180	1.8	93	28.7037	28.7	80	80	0	0	0	0	0	0	1		0
No	175	1985	38	1	0		0	180	1.8	80	24.6914	24.69	80	90	0	0	0	0	0	0	1		0
No	176	1971	52	1	0		0	174	1.74	69	22.7903	22.79	85	80	0	0	0	0	0	0	1		0
No	177	1982	41	1	0		0	184	1.84	93	27.4693	27.47	90	85	0	0	0	0	0	0	1		0
No	189	1976	47	2	1		0.5	165	1.65	50	18.3655	18.37	75	70	0	0	0	0	0	0	1		0
No	190	1977	46	2	1		0.5	164	1.64	68	25.2826	25.28	80	70	0	0	0	0	0	0	1		0
No	191	1993	30	2	1		0.5	162	1.62	54	20.5761	20.58	80	70	0	0	0	0	0	0	1		0
No	192	1988	35	2	1		0.5	170	1.7	78	26.9896	26.99	80	70	0	0	0	0	0	0	1		0
No	193	1991	32	2	1		0.5	160	1.6	67	26.1719	26.17	70	80	0	0	0	0	0	0	1		0
No	194	1988	35	2	1		0.5	167	1.67	69	24.7409	24.74	70	80	0	0	0	0	0	0	1		0
No	195	1986	37	2	1	1	0.8	159	1.59	51	20.1733	20.17	70	80	0	0	0	0	0	0	1		0
No	196	1969	54	2	1	2	1.1	164	1.64	97	36.0648	36.06	80	85	0	0	0	0	0	0	1		0
No	199	1987	36	2	1	2	1.1	168	1.68	56	19.8413	19.84	70	75	0	0	0	0	0	0	1		0
No	202	1984	39	2	1	3	1.4	170	1.7	72	24.9135	24.91	75	70	0	0	0	0	0	0	1		0
No	203	1987	36	2	1	3	1.4	162	1.62	75	28.578	28.58	85	70	0	0	0	0	0	0	1		0
No	207	1976	47	2	1	4	1.7	172	1.72	72	24.3375	24.34	70	80	0	0	0	0	0	0	1		0
No	208	1983	40	2	1	5	2	165	1.65	80	29.3848	29.38	75	85	0	0	0	0	0	0	1		0
No	209	1975	48	2	1	6	2.3	165	1.65	80	29.3848	29.38	80	80	0	0	0	0	0	0	1		0
No	210	1975	48	2	1	5	2	158	1.58	61	24.4352	24.44	80	75	0	0	0	0	0	0	1		0
No	212	1991	32	2	1	0	0.5	166	1.66	57	20.6852	20.69	89	83	0	0	0	0	0	0	1		0
No	232	1990	33	2	1	1	0.8	168	1.68	68	24.093	24.09	80	85	0	0	0	0	0	0	1		0
No	233	1975	48	2	1	6	2.3	162	1.62	54	20.5761	20.58	90	65	0	0	0	0	0	0	1		0
No	234	1992	31	2	1		0.5	164	1.64	75	27.8852	27.89	85	70	0	0	0	0	0	0	1		0
No	235	1994	29	2	1		0.5	154	1.54	62	26.1427	26.14	85	60	0	0	0	0	0	0	1		0
No	236	1986	37	1	0		0	173	1.73	84	28.0664	28.07	80	80	0	0	0	0	0	0	1		0
No	237	1995	28	1	0		0	185	1.85	67	19.5763	19.58	80	85	0	0	0	0	0	0	1		0
No	239	1970	53	1	0		0	170	1.7	78	26.9896	26.99	75	65	0	0	0	0	0	0	1		0
No	241	1978	45	1	0		0	165	1.65	65	23.8751	23.88	70	80	0	0	0	0	0	0	1		0
No	242	1993	30	1	0		0	180	1.8	75	23.1481	23.15	70	70	0	0	0	0	0	0	1		0
No	243	1995	28	1	0		0	182	1.82	88	26.5668	26.57	90	70	0	0	0	0	0	0	1		0
No	263	1955	68	1	0		0	172	1.72	70	23.6614	23.66	90	90	0	0	0	0	0	0	1		0
No	264	1995	28	1	0		0	180	1.8	95	29.321	29.32	80	70	0	0	0	0	0	0	1		0
No	265	1989	34	1	0		0	185	1.85	86	25.1278	25.13	75	80	0	0	0	0	0	0	1		0
No	266	1975	48	1	0		0	185	1.85	85	24.8356	24.84	85	80	0	0	0	0	0	0	1		0
No	267	1966	57	1	0		0	175	1.75	80	26.1224	26.12	95	90	0	0	0	0	0	0	1		0
No	273	2001	22	2	1		0.5	159	1.59	65	25.711	25.71	70	65	0	0	0	0	0	0	1		0
No	276	2003	20	1	0		0	170	1.7	68	23.5294	23.53	80	70	0	0	0	0	0	0	1		0
No	279	1990	33	2	1		0.5	170	1.7	85	29.4118	29.41	80	75	0	0	0	0	0	0	1		0
No	282	1994	29	2	1		0.5	154	1.54	62	26.1427	26.14	80	70	0	0	0	0	0	0	1		0
No	286	1975	48	2	1	4	1.7	162	1.62	54	20.5761	20.58	75	80	0	0	0	0	0	0	1		0
No	287	1970	53	1	0		0	180	1.8	98	30.2469	30.25	80	70	0	0	0	0	0	0	1		0
No	288	1983	40	1	0		0	177	1.77	91	29.0466	29.05	85	80	0	0	0	0	0	0	1		0
No	289	1988	35	2	1		0.5	158	1.58	59	23.634	23.63	65	60	0	0	0	0	0	0	1		0
No	294	1983	40	1	0		0	181	1.81	98	29.9136	29.91	90	70	0	0	0	0	0	0	1		0
No	295	1975	48	1	0		0	185	1.85	67	19.5763	19.58	80	80	0	0	0	0	0	0	1		0
No	298	1998	25	1	0		0	182	1.82	180	54.3413	54.34	75	90	0	0	0	0	0	0	1		0
No	299	1998	25	1	0		0	182	1.82	88	26.5668	26.57	90	90	0	0	0	0	0	0	1		0
No	302	1998	25	1	0		0	176	1.76	66	21.3068	21.31	75	65	0	0	0	0	0	0	1		0
No	326	1986	37	2	1	2	1.1	165	1.65	69	25.3444	25.34	80	70	0	0	0	0	0	0	1		0
Yes	331	1958	65	1	0		0	181	1.81	89	27.1664	27.17	200	70	0	0	0	0	0	0	1		0
Yes	332	1963	60	1	0		0	180	1.8	185	57.0988	57.1	95	200	0	0	0	0	0	0	1		0
Yes	333	1964	59	1	0		0	176	1.76	107	34.5429	34.54	135	90	0	0	0	0	0	0	1		0
No	334	2004	19	2	1		0.5	170	1.7	67	23.1834	23.18	60	60	0	0	0	0	0	0	1		0
Yes	363	1965	58	2	1	3	1.4	165	1.65	75	27.5482	27.55	130	60	0	0	0	0	0	0	1		0
Yes	369	1970	53	2	1	1	0.8	167	1.67	79	28.3266	28.33	100	150	0	0	0	0	0	0	1		0
No	443		44	1	0		0	180	1.8	93	28.7037	28.7	80	70	0	0	0	0	0	0	1		0
No	444	1962	62	1	0		0	176	1.76	95	30.6689	30.67	80	70	0	0	0	0	0	0	1		0
No	447		54	1	0		0	185	1.85	84	24.5435	24.54	80	85	0	0	0	0	0	0	1		0
No	452		29	1	0		0	170	1.7	67	23.1834	23.18	80	80	0	0	0	0	0	0	1		0
No	455		38	1	0		0	175	1.75	92	30.0408	30.04	80	80	0	0	0	0	0	0	1		0
No	456		45	1	0		0	180	1.8	93	28.7037	28.7	80	70	0	0	0	0	0	0	1		0
No	457		62	1	0		0	176	1.76	85	27.4406	27.44	80	90	0	0	0	0	0	0	1		0
No	460		54	1	0		0	180	1.8	86	26.5432	26.54	80	85	0	0	0	0	0	0	1		0
No	461		38	1	0		0	176	1.76	90	29.0548	29.05	85	80	0	0	0	0	0	0	1		0
No	462		47	1	0		0	175	1.75	85	27.7551	27.76	85	85	0	0	0	0	0	0	1		0
No	464		45	2	1	5	2	165	1.65	70	25.7117	25.71	80	90	0	0	0	0	0	0	1		0
No	465		55	2	1	5	2	159	1.59	68	26.8977	26.9	80	80	0	0	0	0	0	0	1		0
No	466		66	2	1	6	2.3	165	1.65	65	23.8751	23.88	80	90	0	0	0	0	0	0	1		0
No	467		88	2	1	10	3.5	156	1.56	68	27.9421	27.94	80	80	0	0	0	0	0	0	1		0
No	468		75	2	1	8	2.9	158	1.58	69	27.6398	27.64	90	80	0	0	0	0	0	0	1		0
No	469		90	2	1	8	2.9	155	1.55	63	26.2227	26.22	80	80	0	0	0	0	0	0	1		0
No	470		78	2	1	9	3.2	158	1.58	65	26.0375	26.04	75	80	0	0	0	0	0	0	1		0
No	471		19	2	1		0.5	168	1.68	70	24.8016	24.8	80	65	0	0	0	0	0	0	1		0
No	472		22	2	1		0.5	165	1.65	60	22.0386	22.04	65	70	0	0	0	0	0	0	1		0
No	473	2005	19	2	1		0.5	168	1.68	65	23.03	23.03	80	70	0	0	0	0	0	0	1		0
No	474		45	2	1	5	2	165	1.65	65	23.8751	23.88	80	80	0	0	0	0	0	0	1		0
No	475		56	2	1	4	1.7	169	1.69	70	24.5089	24.51	65	65	0	0	0	0	0	0	1		0
No	476		85	2	1	8	2.9	155	1.55	58	24.1415	24.14	80	90	0	0	0	0	0	0	1		0
No	477		55	2	1		0.5	168	1.68	70	24.8016	24.8	85	80	0	0	0	0	0	0	1		0
No	478		25	2	1		0.5	170	1.7	72	24.9135	24.91	80	85	0	0	0	0	0	0	1		0
No	479		28	2	1		0.5	162	1.62	62	23.6244	23.62	75	80	0	0	0	0	0	0	1		0
No	480		27	2	1	1	0.8	168	1.68	69	24.4473	24.45	80	80	0	0	0	0	0	0	1		0
No	481		33	2	1	2	1.1	159	1.59	60	23.7332	23.73	80	80	0	0	0	0	0	0	1		0
No	482		35	2	1		0.5	159	1.59	62	24.5243	24.52	85	80	0	0	0	0	0	0	1		0
No	483		30	2	1		0.5	165	1.65	60	22.0386	22.04	80	85	0	0	0	0	0	0	1		0
No	484		21	2	1		0.5	168	1.68	70	24.8016	24.8	80	85	0	0	0	0	0	0	1		0
No	485		22	2	1		0.5	168	1.68	62	21.9671	21.97	75	70	0	0	0	0	0	0	1		0
No	486		20	2	1		0.5	167	1.67	65	23.3067	23.31	65	65	0	0	0	0	0	0	1		0
No	487		28	2	1		0.5	168	1.68	70	24.8016	24.8	65	70	0	0	0	0	0	0	1		0
No	488	1998	26	2	1		0.5	168	1.68	65	23.03	23.03	75	65	0	0	0	0	0	0	1		0
No	489		24	2	1	1	0.8	168	1.68	65	23.03	23.03	75	85	0	0	0	0	0	0	1		0
No	490		29	2	1		0.5	167	1.67	65	23.3067	23.31	65	80	0	0	0	0	0	0	1		0
No	491		40	2	1	4	1.7	165	1.65	68	24.977	24.98	75	70	0	0	0	0	0	0	1		0
No	492		38	2	1	3	1.4	167	1.67	70	25.0995	25.1	90	80	0	0	0	0	0	0	1		0
No	493	1994	30	2	1		0.5	159	1.59	55	21.7555	21.76	80	85	0	0	0	0	0	0	1		0
No	494		38	2	1		0.5	168	1.68	62	21.9671	21.97	75	80	0	0	0	0	0	0	1		0
No	495		50	2	1		0.5	165	1.65	68	24.977	24.98	70	80	0	0	0	0	0	0	1		0
No	496		47	1	0		0	170	1.7	78	26.9896	26.99	70	75	0	0	0	0	0	0	1		0
No	497		19	1	0		0	172	1.72	68	22.9854	22.99	80	80	0	0	0	0	0	0	1		0
No	498	1999	25	1	0		0	175	1.75	75	24.4898	24.49	85	80	0	0	0	0	0	0	1		0
No	499		34	1	0		0	173	1.73	74	24.7252	24.73	69	75	0	0	0	0	0	0	1		0
No	500		44	1	0		0	173	1.73	76	25.3934	25.39	80	75	0	0	0	0	0	0	1		0
Yes	513	1983	41	1	0		0	170	1.7	68	23.5294	23.53	140	70	0	0	0	0	0	0	1		0
Yes	515	1963	60	2	1	5	2	153	1.53	75	32.039	32.04	153	70	0	0	0	0	0	0	1		0
Yes	524	1949	75	1	0		0	182	1.82	84	25.3593	25.36	170	60	0	1	0	0	0	0	0		0.4
Yes	525	1984	40	2	1	4	1.7	154	1.54	99	41.744	41.74	250	88	0	0	0	0	0	0	1		0	1954
Yes	529	1966	55	2	1	6	2.3	166	1.66	72	26.1286	26.13	200	80	0	0	0	0	0	0	1		0
Yes	531	1941	84	1	0		0	165	1.65	70	25.7117	25.71	191	80	1	0	0	0	0	0	0		0.3
Yes	532	1978	46	2	1	2	1.1	165	1.65	84	30.854	30.85	161	70	0	0	0	0	0	0	1		0	1960
Yes	533	1967	57	2	1	7	2.6	165	1.65	107	39.3021	39.3	130	80	0	0	0	0	0	0	1		0	1934
Yes	534	1960	64	2	1	8	2.9	177	1.77	89	28.4082	28.41	113	80	0	0	0	0	0	0	1		0	1944
No	544	1999	25	1	0		0	175	1.75	75	24.4898	24.49	80	70	0	0	0	0	0	0	1		0
No	545	1993	31	1	0		0	180	1.8	83	25.6173	25.62	75	70	0	0	0	0	0	0	1		0
No	546	1985	38	1	0		0	182	1.82	87	26.2649	26.26	85	70	0	0	0	0	0	0	1		0
No	547	1977	46	1	0		0	178	1.78	78	24.6181	24.62	75	70	0	0	0	0	0	0	1		0
No	548	1994	29	2	1	1	0.8	168	1.68	68	24.093	24.09	65	70	0	0	0	0	0	0	1		0
No	549	1976	47	2	1	6	2.3	165	1.65	70	25.7117	25.71	75	70	0	0	0	0	0	0	1		0
No	550	1986	37	2	1	4	1.7	167	1.67	70	25.0995	25.1	70	80	0	0	0	0	0	0	1		0
No	551	1966	57	2	1	8	2.9	162	1.62	69	26.2917	26.29	80	70	0	0	0	0	0	0	1		0
No	552	2000	23	1	0		0	170	1.7	68	23.5294	23.53	70	70	0	0	0	0	0	0	1		0
No	553	2005	18	1	0		0	175	1.75	68	22.2041	22.2	75	70	0	0	0	0	0	0	1		0
No	554	2003	20	1	0		0	180	1.8	75	23.1481	23.15	75	70	0	0	0	0	0	0	1		0
No	555	2004	19	2	1		0.5	165	1.65	60	22.0386	22.04	75	70	0	0	0	0	0	0	1		0
No	556	1998	25	2	1	1	0.8	168	1.68	68	24.093	24.09	74	75	0	0	0	0	0	0	1		0
No	557	1995	28	2	1	2	1.1	161	1.61	60	23.1473	23.15	74	70	0	0	0	0	0	0	1		0
No	558	1999	24	2	1		0.5	161	1.61	57	21.9899	21.99	70	65	0	0	0	0	0	0	1		0
No	559	1956	67	1	0		0	169	1.69	70	24.5089	24.51	70	80	0	0	0	0	0	0	1		0
No	560	1988	35	2	1		0.5	168	1.68	68	24.093	24.09	70	70	0	0	0	0	0	0	1		0
No	561	1979	44	2	1	6	2.3	167	1.67	69	24.7409	24.74	80	85	0	0	0	0	0	0	1		0
No	562	1996	27	2	1	3	1.4	170	1.7	74	25.6055	25.61	85	85	0	0	0	0	0	0	1		0
No	563	1994	29	2	1	4	1.7	165	1.65	69	25.3444	25.34	80	85	0	0	0	0	0	0	1		0
No	564	1985	38	1	0		0	175	1.75	80	26.1224	26.12	85	80	0	0	0	0	0	0	1		0
No	565	2000	23	2	1		0.5	170	1.7	75	25.9516	25.95	75	80	0	0	0	0	0	0	1		0
No	566	1990	33	2	1		0.5	171	1.71	74	25.3069	25.31	75	70	0	0	0	0	0	0	1		0
No	567	1983	40	2	1	5	2	169	1.69	70	24.5089	24.51	85	80	0	0	0	0	0	0	1		0
No	568	1995	28	2	1		0.5	161	1.61	60	23.1473	23.15	70	70	0	0	0	0	0	0	1		0
Yes	571	1958	66	2	1	11	3.8	149	1.49	79	35.584	35.58	160	91	0	0	0	0	0	0	1		0	1935
No	579	1990	34	1	0		0	165	1.65	75	27.5482	27.55	85	90	0	0	0	0	0	0	1		0	1957
No	601	1999	25	1	0		0	173	1.73	69	23.0546	23.05	70	80	0	0	0	0	0	0	1		0
No	602	1998	26	1	0		0	173	1.73	70	23.3887	23.39	70	80	0	0	0	0	0	0	1		0
No	603	1997	27	1	0		0	173	1.73	71	23.7228	23.72	70	80	0	0	0	0	0	0	1		0
No	604	1996	28	1	0		0	173	1.73	80	26.7299	26.73	70	80	0	0	0	0	0	0	1		0
No	605	1995	29	1	0		0	173	1.73	73	24.3911	24.39	70	80	0	0	0	0	0	0	1		0
No	606	1994	30	1	0		0	173	1.73	74	24.7252	24.73	70	80	0	0	0	0	0	0	1		0
No	607	1993	31	1	0		0	173	1.73	75	25.0593	25.06	70	80	0	0	0	0	0	0	1		0
No	608	1992	32	1	0		0	173	1.73	76	25.3934	25.39	70	80	0	0	0	0	0	0	1		0
No	609	1991	33	1	0		0	173	1.73	77	25.7276	25.73	70	80	0	0	0	0	0	0	1		0
No	610	1990	34	1	0		0	173	1.73	78	26.0617	26.06	70	80	0	0	0	0	0	0	1		0
No	611	1989	35	1	0		0	173	1.73	80	26.7299	26.73	75	75	0	0	0	0	0	0	1		0
No	612	1988	36	1	0		0	170	1.7	80	27.6817	27.68	75	75	0	0	0	0	0	0	1		0
No	613	1987	37	1	0		0	167	1.67	72	25.8166	25.82	75	75	0	0	0	0	0	0	1		0
No	614	1986	38	1	0		0	168	1.68	82	29.0533	29.05	75	75	0	0	0	0	0	0	1		0
No	615	2002	22	1	0		0	180	1.8	83	25.6173	25.62	75	75	0	0	0	0	0	0	1		0
No	616	2003	21	1	0		0	182	1.82	93	28.0763	28.08	75	75	0	0	0	0	0	0	1		0
No	617	2002	22	1	0		0	180	1.8	90	27.7778	27.78	75	75	0	0	0	0	0	0	1		0
No	618	2001	23	1	0		0	172	1.72	87	29.4078	29.41	75	75	0	0	0	0	0	0	1		0
No	619	2000	24	1	0		0	173	1.73	84	28.0664	28.07	75	75	0	0	0	0	0	0	1		0
No	620	1999	25	1	0		0	180	1.8	81	25	25	75	75	0	0	0	0	0	0	1		0
No	621	1998	26	1	0		0	175	1.75	78	25.4694	25.47	75	75	0	0	0	0	0	0	1		0
No	622	1997	27	1	0		0	176	1.76	75	24.2123	24.21	75	75	0	0	0	0	0	0	1		0
No	623	1996	28	1	0		0	180	1.8	72	22.2222	22.22	75	75	0	0	0	0	0	0	1		0
No	624	1995	29	1	0		0	178	1.78	77	24.3025	24.3	75	75	0	0	0	0	0	0	1		0
No	625	1994	30	1	0		0	179	1.79	80	24.968	24.97	75	75	0	0	0	0	0	0	1		0
No	626	1993	31	1	0		0	180	1.8	81	25	25	75	75	0	0	0	0	0	0	1		0
No	627	1992	32	1	0		0	181	1.81	77	23.5036	23.5	75	75	0	0	0	0	0	0	1		0
No	628	1991	33	1	0		0	176	1.76	83	26.7949	26.79	75	75	0	0	0	0	0	0	1		0
No	629	1990	34	1	0		0	183	1.83	80	23.8884	23.89	75	75	0	0	0	0	0	0	1		0
No	630	1989	35	1	0		0	170	1.7	85	29.4118	29.41	75	75	0	0	0	0	0	0	1		0
No	631	1988	36	1	0		0	185	1.85	86	25.1278	25.13	75	75	0	0	0	0	0	0	1		0
No	632	1987	37	1	0		0	174	1.74	78	25.763	25.76	75	75	0	0	0	0	0	0	1		0
No	633	1986	38	1	0		0	187	1.87	88	25.1651	25.17	75	75	0	0	0	0	0	0	1		0
No	634	1985	39	1	0		0	180	1.8	70	21.6049	21.6	75	75	0	0	0	0	0	0	1		0
No	635	1984	40	1	0		0	181	1.81	71	21.6721	21.67	75	75	0	0	0	0	0	0	1		0
No	636	1983	41	1	0		0	182	1.82	77	23.246	23.25	75	75	0	0	0	0	0	0	1		0
No	637	1982	42	1	0		0	170	1.7	73	25.2595	25.26	75	75	0	0	0	0	0	0	1		0
No	638	1981	43	1	0		0	184	1.84	80	23.6295	23.63	75	75	0	0	0	0	0	0	1		0
No	639	1980	44	1	0		0	185	1.85	82	23.9591	23.96	75	75	0	0	0	0	0	0	1		0
No	640	1979	45	1	0		0	184	1.84	76	22.448	22.45	75	75	0	0	0	0	0	0	1		0
No	641	1978	46	1	0		0	183	1.83	85	25.3815	25.38	75	75	0	0	0	0	0	0	1		0
No	642	1977	47	1	0		0	177	1.77	78	24.8971	24.9	75	75	0	0	0	0	0	0	1		0
No	643	1976	48	1	0		0	181	1.81	79	24.114	24.11	75	75	0	0	0	0	0	0	1		0
No	644	1975	49	1	0		0	175	1.75	80	26.1224	26.12	75	75	0	0	0	0	0	0	1		0
No	645	1974	50	2	1		0.5	160	1.6	57	22.2656	22.27	75	75	0	0	0	0	0	0	1		0
No	646	1973	51	2	1		0.5	161	1.61	58	22.3757	22.38	75	75	0	0	0	0	0	0	1		0
No	647	1972	52	2	1		0.5	162	1.62	59	22.4813	22.48	75	75	0	0	0	0	0	0	1		0
No	648	1971	53	2	1		0.5	163	1.63	57	21.4536	21.45	75	75	0	0	0	0	0	0	1		0
No	649	2004	20	2	1		0.5	166	1.66	61	22.1367	22.14	75	75	0	0	0	0	0	0	1		0
No	650	2003	21	2	1		0.5	165	1.65	62	22.7732	22.77	75	75	0	0	0	0	0	0	1		0
No	651	2002	22	2	1		0.5	171	1.71	60	20.5191	20.52	80	75	0	0	0	0	0	0	1		0
No	652	2001	23	2	1		0.5	167	1.67	64	22.9481	22.95	80	75	0	0	0	0	0	0	1		0
No	653	2000	24	2	1		0.5	162	1.62	59	22.4813	22.48	80	75	0	0	0	0	0	0	1		0
No	654	1999	25	2	1		0.5	169	1.69	66	23.1084	23.11	80	75	0	0	0	0	0	0	1		0
No	655	1998	26	2	1		0.5	170	1.7	80	27.6817	27.68	80	75	0	0	0	0	0	0	1		0
No	656	1997	27	2	1		0.5	171	1.71	80	27.3588	27.36	80	70	0	0	0	0	0	0	1		0
No	657	1996	28	2	1	1	0.8	172	1.72	77	26.0276	26.03	80	70	0	0	0	0	0	0	1		0
No	658	1995	29	2	1		0.5	168	1.68	74	26.2188	26.22	80	70	0	0	0	0	0	0	1		0
No	659	1994	30	2	1		0.5	166	1.66	71	25.7657	25.77	80	70	0	0	0	0	0	0	1		0
No	660	1993	31	2	1		0.5	184	1.84	68	20.0851	20.09	80	70	0	0	0	0	0	0	1		0
No	661	1992	32	2	1		0.5	166	1.66	65	23.5883	23.59	80	70	0	0	0	0	0	0	1		0
No	662	1991	33	2	1		0.5	155	1.55	62	25.8065	25.81	82	70	0	0	0	0	0	0	1		0
No	663	1990	34	2	1		0.5	156	1.56	59	24.2439	24.24	76	70	0	0	0	0	0	0	1		0
No	664	1991	33	2	1		0.5	157	1.57	56	22.719	22.72	78	70	0	0	0	0	0	0	1		0
No	665	1992	32	2	1	2	1.1	166	1.66	65	23.5883	23.59	79	70	0	0	0	0	0	0	1		0
No	666	1993	31	2	1		0.5	159	1.59	55	21.7555	21.76	84	70	0	0	0	0	0	0	1		0
No	667	1994	30	2	1		0.5	155	1.55	50	20.8117	20.81	83	70	0	0	0	0	0	0	1		0
No	668	1995	29	2	1		0.5	161	1.61	61	23.533	23.53	90	75	0	0	0	0	0	0	1		0
No	669	1996	28	2	1		0.5	162	1.62	62	23.6244	23.62	90	75	0	0	0	0	0	0	1		0
No	670	1997	27	2	1		0.5	158	1.58	66	26.4381	26.44	90	75	0	0	0	0	0	0	1		0
No	671	1998	26	2	1		0.5	164	1.64	64	23.7954	23.8	90	75	0	0	0	0	0	0	1		0
No	672	1999	25	2	1		0.5	165	1.65	67	24.6097	24.61	91	75	0	0	0	0	0	0	1		0
No	673	2000	24	2	1		0.5	166	1.66	66	23.9512	23.95	65	75	0	0	0	0	0	0	1		0
No	674	1990	34	2	1	4	1.7	159	1.59	67	26.5021	26.5	65	75	0	0	0	0	0	0	1		0
No	675	1991	33	2	1		0.5	168	1.68	68	24.093	24.09	65	75	0	0	0	0	0	0	1		0
No	676	1990	34	2	1	2	1.1	169	1.69	69	24.1588	24.16	65	75	0	0	0	0	0	0	1		0
No	677	1990	34	2	1		0.5	168	1.68	70	24.8016	24.8	65	75	0	0	0	0	0	0	1		0
No	678	1990	34	2	1		0.5	170	1.7	75	25.9516	25.95	65	75	0	0	0	0	0	0	1		0
No	679	1990	34	2	1		0.5	166	1.66	66	23.9512	23.95	65	65	0	0	0	0	0	0	1		0
No	680	1990	34	2	1		0.5	165	1.65	66	24.2424	24.24	70	65	0	0	0	0	0	0	1		0
No	681	1983	41	2	1		0.5	156	1.56	55	22.6003	22.6	81	65	0	0	0	0	0	0	1		0
No	682	1984	40	2	1		0.5	163	1.63	68	25.5937	25.59	70	65	0	0	0	0	0	0	1		0
No	683	1985	39	2	1	4	1.7	162	1.62	58	22.1003	22.1	70	65	0	0	0	0	0	0	1		0
No	684	1986	38	2	1	2	1.1	161	1.61	70	27.0051	27.01	70	65	0	0	0	0	0	0	1		0
No	685	1987	37	2	1		0.5	161	1.61	71	27.3909	27.39	82	65	0	0	0	0	0	0	1		0
No	686	1988	36	2	1		0.5	159	1.59	57	22.5466	22.55	70	65	0	0	0	0	0	0	1		0
No	687	1989	35	2	1		0.5	161	1.61	58	22.3757	22.38	84	65	0	0	0	0	0	0	1		0
No	688	1990	34	2	1		0.5	163	1.63	60	22.5827	22.58	70	65	0	0	0	0	0	0	1		0
No	689	1991	33	2	1		0.5	165	1.65	60	22.0386	22.04	86	65	0	0	0	0	0	0	1		0
No	690	1992	32	2	1	3	1.4	167	1.67	70	25.0995	25.1	70	65	0	0	0	0	0	0	1		0
No	691	1993	31	2	1		0.5	169	1.69	62	21.7079	21.71	87	65	0	0	0	0	0	0	1		0
No	692	1994	30	2	1	4	1.7	167	1.67	63	22.5896	22.59	70	65	0	0	0	0	0	0	1		0
No	693	1995	29	2	1		0.5	165	1.65	64	23.5078	23.51	70	65	0	0	0	0	0	0	1		0
No	694	1995	29	2	1		0.5	155	1.55	57	23.7253	23.73	82	65	0	0	0	0	0	0	1		0
No	695	1995	29	2	1	1	0.8	161	1.61	70	27.0051	27.01	70	65	0	0	0	0	0	0	1		0
No	696	1995	29	2	1	2	1.1	161	1.61	60	23.1473	23.15	70	65	0	0	0	0	0	0	1		0
No	697	1996	28	2	1	2	1.1	157	1.57	59	23.9361	23.94	70	65	0	0	0	0	0	0	1		0
No	698	1997	27	2	1		0.5	166	1.66	67	24.3141	24.31	70	65	0	0	0	0	0	0	1		0
No	699	1998	26	2	1		0.5	162	1.62	66	25.1486	25.15	80	65	0	0	0	0	0	0	1		0
No	2	1990	33	2	1	2	1.1	169	1.69	90	31.5115	31.51	80	80	1	0	0	0	1	1	0		0.3	1958
Yes	4	1974	49	1	0		0	177	1.77	90	28.7274	28.73	150	85	0	0	0	0	0	1	0		0	1954
Yes	6	1968	55	1	0		0	183	1.83	80	23.8884	23.89	95	60	1	0	0	0	0	1	0		0.3	1948
Yes	7	1984	39	2	1	4	1.7	170	1.7	120	41.5225	41.52	111	70	0	1	0	0	0	0	0		0.4	1952
Yes	8	1987	36	2	1	3	1.4	170	1.7	80	27.6817	27.68	160	60	1	1	1	0	0	0	0	2	1	1959
Yes	9	1963	60	2	1	5	2	165	1.65	88	32.3232	32.32	200	80	1	1	1	0	0	1	0	1	1	1934
Yes	10	2000	23	2	1	0	0.5	160	1.6	65	25.3906	25.39	95	80	1	0	0	0	0	0	0		0.3	1974
Yes	11	1960	63	2	1	9	3.2	170	1.7	90	31.1419	31.14	104	80	1	0	1	0	0	0	0	1	0.6
Yes	12	1967	56	2	1	3	1.4	153	1.53	68	29.0487	29.05	132	70	1	1	1	0	0	0	0	2	1	1934
Yes	13	1968	55	2	1	1	0.8	158	1.58	62	24.8358	24.84	140	70	1	0	0	0	0	0	0		0.3
Yes	15	1967	56	2	1	2	1.1	161	1.61	68	26.2336	26.23	200	70	1	1	1	0	0	0	0	3	1	1945
Yes	16	1964	59	2	1	0	0.5	155	1.55	85	35.3798	35.38	200	80	1	1	1	0	1	0	0	4	1	1945
Yes	17	1952	71	2	1	6	2.3	155	1.55	65	27.0552	27.06	146	70	0	0	0	0	0	1	0		0	1911
Yes	18	1957	66	2	1	10	3.5	168	1.68	85	30.1162	30.12	200	80	0	0	1	0	0	0	0	4	0.3
Yes	19	1968	55	2	1	6	2.3	160	1.6	82	32.0312	32.03	146	80	1	1	0	0	0	0	0		0.7	1946
Yes	20	1968	55	2	1	6	2.3	159	1.59	78	30.8532	30.85	114	70	1	0	1	0	0	0	0	3	0.6
No	21	1980	43	1	0		0	170	1.7	80	27.6817	27.68	80	70	0	1	0	0	0	0	0		0.4	1945
Yes	22	1970	53	2	1	6	2.3	165	1.65	70	25.7117	25.71	200	110	1	1	1	0	0	0	0	4	1
No	23	1951	72	1	0		0	170	1.7	80	27.6817	27.68	90	70	1	1	0	0	0	0	0		0.7	1911
No	24	1983	40	2	1	4	1.7	185	1.85	81	23.6669	23.67	69	85	1	0	0	0	0	0	0		0.3	1960
Yes	25	1960	63	1	0		0	184	1.84	89	26.2878	26.29	185	90	1	0	0	0	0	0	0		0.3
Yes	26	1982	41	2	1	5	2	170	1.7	103	35.6401	35.64	130	80	1	1	1	0	0	0	0	1	1	1962
No	27	1985	38	1	0		0	175	1.75	77	25.1429	25.14	70	70	1	1	1	0	0	0	0		1	1962
Yes	28	2007	18	2	1		0.5	158	1.58	90	36.0519	36.05	165	60	1	1	0	0	0	0	0		0.7	1974
No	29	2007	18	2	1		0.5	168	1.68	50	17.7154	17.72	70	60	0	0	0	0	0	1	0		0	1976
No	30	2006	18	2	1		0.5	168	1.68	60	21.2585	21.26	70	70	0	1	0	1	1	0	0		0.4	1969
Yes	31	1969	54	2	1	1	0.8	170	1.7	78	26.9896	26.99	140	90	0	1	1	0	0	0	0	1	0.7	1948
Yes	33	1966	57	1	0		0	185	1.85	70	20.4529	20.45	200	80	0	1	0	0	0	0	0		0.4
Yes	34	1982	41	2	1	0	0.5	172	1.72	90	30.4218	30.42	132	90	1	1	1	0	0	0	0	4	1	1942
Yes	36	1969	54	2	1	9	3.2	160	1.6	104	40.625	40.63	212	90	1	1	1	0	0	0	0	2	1
No	40	1993	30	2	1		0.5	159	1.59	60	23.7332	23.73	80	65	0	0	0	0	1	0	0		0	1962
No	41	1998	25	2	1		0.5	165	1.65	65	23.8751	23.88	85	65	1	1	1	1	1	1	0	2	1	1961
No	42	1988	35	2	1	2	1.1	168	1.68	65	23.03	23.03	85	70	1	1	1	1	1	1	0	2	1	1961
No	43	1991	32	1	0		0	170	1.7	70	24.2215	24.22	75	70	0	1	1	1	1	0	0	1	0.7	1965
Yes	44	1969	54	1	0		0	171	1.71	75	25.6489	25.65	130	145	0	1	1	0	1	0	0	1	0.7	1941
Yes	45	1965	58	2	1	4	1.7	160	1.6	95	37.1094	37.11	150	80	1	0	1	1	0	1	0	1	0.6	1946
Yes	46	1968	55	1	0		0	175	1.75	71	23.1837	23.18	140	80	1	0	1	1	0	1	0	1	0.6	1946
Yes	47	1958	65	2	1	6	2.3	155	1.55	60	24.974	24.97	160	90	0	0	0	1	1	0	0		0	1930
Yes	48	1978	45	1	0		0	180	1.8	79	24.3827	24.38	190	70	1	1	1	1	1	1	0	1	1	1961
Yes	49	1979	44	1	0		0	167	1.67	98	35.1393	35.14	90	95	0	0	1	0	0	1	0	1	0.3	1954
Yes	50	1948	75	1	0		0	168	1.68	70	24.8016	24.8	165	85	0	1	1	0	0	0	0	2	0.7	1920
Yes	51	1954	69	1	0		0	169	1.69	80	28.0102	28.01	155	90	0	1	1	0	0	0	0	5	0.7	1936
Yes	52	1977	46	1	0		0	182	1.82	82	24.7555	24.76	155	85	1	0	0	1	0	0	0		0.3	1956
Yes	53	1967	56	1	0		0	171	1.71	85	29.0688	29.07	130	85	0	1	0	0	0	0	0		0.4	1949
Yes	54	1973	50	1	0		0	182	1.82	90	27.1706	27.17	145	85	0	1	1	0	0	0	0	1	0.7	1930
No	55	1950	73	1	0		0	168	1.68	78	27.6361	27.64	85	85	0	1	1	0	0	0	0	2	0.7	1930
Yes	56	1980	43	2	1	3	1.4	165	1.65	95	34.8944	34.89	145	85	0	1	0	0	0	0	0		0.4	1955
Yes	57	1955	68	2	1	5	2	165	1.65	70	25.7117	25.71	145	85	1	0	0	0	0	0	0		0.3	1936
No	58	1995	28	2	1		0.5	159	1.59	80	31.6443	31.64	72	70	0	1	0	0	0	0	0		0.4	1970
No	59	1997	26	2	1		0.5	155	1.55	49	20.3954	20.4	66	60	1	0	0	0	0	0	0		0.3	1972
Yes	60	1984	39	2	1		0.5	170	1.7	70	24.2215	24.22	85	80	0	1	1	0	0	0	0	1	0.7	1952
Yes	61	1971	52	1	0		0	178	1.78	85	26.8274	26.83	160	90	0	1	0	0	0	0	0		0.4	1950
Yes	62	1970	53	1	0		0	167	1.67	70	25.0995	25.1	140	80	0	1	0	0	0	0	0		0.4	1940
No	63	2000	23	1	0		0	170	1.7	85	29.4118	29.41	75	70	1	0	0	0	0	0	0		0.3	1972
No	65	2004	19	1	0		0	169	1.69	68	23.8087	23.81	72	65	1	0	0	0	0	1	0		0.3	1974
No	66	2002	21	1	0		0	170	1.7	70	24.2215	24.22	75	65	1	0	0	0	0	1	0		0.3	1974
Yes	69	1958	65	2	1	3	1.4	165	1.65	79	29.0174	29.02	124	60	1	1	1	0	0	0	0	1	1
Yes	70	1973	50	1	0		0	181	1.81	97	29.6084	29.61	110	130	0	0	0	0	1	0	0		0	1957
No	71	1974	49	2	1		0.5	170	1.7	70	24.2215	24.22	75	60	0	1	1	0	0	0	0	1	0.7
Yes	72	1952	71	2	1	5	2	156	1.56	45	18.4911	18.49	81	70	0	0	1	0	0	0	0	2	0.3
No	75	1991	32	2	1		0.5	168	1.68	66	23.3844	23.38	98	60	1	1	0	1	1	1	0		0.7	1969
No	76	1996	27	2	1		0.5	162	1.62	60	22.8624	22.86	85	60	0	1	0	1	1	0	0		0.4	1969
No	77	1993	30	2	1		0.5	160	1.6	64	25	25	75	80	1	1	0	0	0	0	0		0.7	1963
No	78	1993	30	2	1		0.5	162	1.62	65	24.7676	24.77	55	90	1	1	0	0	0	0	0		0.7	1963
Yes	82	1998	25	2	1	5	2	167	1.67	60	21.5139	21.51	198	80	1	1	1	0	0	0	0	2	1	1948
Yes	83	1967	56	2	1	6	2.3	160	1.6	75	29.2969	29.3	150	100	0	1	0	0	0	0	0		0.4
Yes	84	1948	75	2	1	12	4.1	160	1.6	60	23.4375	23.44	140	70	0	1	0	0	0	0	0		0.4
Yes	87	1975	48	2	1	4	1.7	162	1.62	69	26.2917	26.29	200	70	1	0	0	0	0	0	0		0.3
Yes	88	1959	64	2	1	4	1.7	170	1.7	90	31.1419	31.14	190	80	0	1	1	0	0	0	0	1	0.7	1936
Yes	89	1966	57	2	1	10	3.5	167	1.67	90	32.2708	32.27	200	70	1	1	1	0	0	0	0	3	1	1935
Yes	90	1964	59	2	1	2	1.1	159	1.59	60	23.7332	23.73	189	70	1	0	1	0	0	0	0	2	0.6
Yes	92	1968	55	2	1	6	2.3	168	1.68	98	34.7222	34.72	145	110	0	0	1	0	0	0	0	2	0.3	1932
Yes	93	1958	65	2	1	5	2	161	1.61	80	30.863	30.86	160	100	1	1	1	0	0	0	0	1	1	1928
Yes	94	1946	77	2	1	10	3.5	169	1.69	80	28.0102	28.01	100	60	1	0	1	0	0	0	0	1	0.6	1946
Yes	95	1977	46	1	0		0	170	1.7	80	27.6817	27.68	200	70	1	0	1	0	0	0	0	1	0.6	1946
Yes	96	1976	47	1	0		0	175	1.75	72	23.5102	23.51	200	60	0	1	1	0	0	0	0	1	0.7	1971
Yes	97	1963	60	2	1	2	1.1	176	1.76	70	22.5981	22.6	200	100	1	1	0	1	1	1	0		0.7	1937
Yes	98	1958	65	2	1	3	1.4	160	1.6	70	27.3437	27.34	200	70	0	0	1	0	0	0	0	3	0.3	1936
Yes	99	1963	60	2	1	4	1.7	160	1.6	80	31.25	31.25	200	60	1	0	0	0	0	0	0		0.3	1938
Yes	100	1982	41	2	1		0.5	165	1.65	60	22.0386	22.04	170	60	1	1	0	0	0	0	0		0.7	1960
No	101	2005	18	2	1		0.5	147	1.47	60	27.7662	27.77	90	60	0	0	0	1	0	0	0		0	1971
Yes	102	1957	66	2	1		0.5	147	1.47	75	34.7078	34.71	120	65	1	1	0	0	0	0	0		0.7
Yes	103	1963	60	2	1		0.5	180	1.8	78	24.0741	24.07	200	70	1	1	1	0	0	0	0	3	1	1932
No	104	1986	37	2	1	3	1.4	170	1.7	84	29.0657	29.07	95	70	0	0	0	1	0	0	0		0	1966
Yes	105	1968	55	2	1	4	1.7	165	1.65	62	22.7732	22.77	170	60	0	1	1	0	0	0	0	2	0.7
Yes	106	1971	52	2	1		0.5	160	1.6	100	39.0625	39.06	100	70	0	0	1	0	0	0	0	2	0.3	1945
Yes	107	1965	58	1	0		0	170	1.7	80	27.6817	27.68	120	70	0	0	1	0	0	0	0	1	0.3	1946
Yes	108	1970	53	2	1	2	1.1	158	1.58	65	26.0375	26.04	200	100	1	0	0	0	0	0	0		0.3
Yes	109	1957	66	2	1	7	2.6	162	1.62	55	20.9572	20.96	200	60	0	1	1	0	0	0	0	1	0.7
No	111	1996	27	1	0		0	170	1.7	78	26.9896	26.99	70	65	0	1	0	0	0	0	0		0.4	1970
Yes	115	1978	45	2	1	0	0.5	160	1.6	80	31.25	31.25	120	70	0	1	0	0	0	0	0		0.4
Yes	116	1981	42	1	0		0	171	1.71	106	36.2505	36.25	130	95	1	0	0	0	0	0	0		0.3
Yes	117	1979	44	1	0		0	173	1.73	94	31.4077	31.41	160	70	1	1	1	0	0	0	0	2	1
Yes	118	1967	56	2	1		0.5	165	1.65	68	24.977	24.98	170	80	1	0	0	0	0	0	0		0.3
No	120	1991	32	1	0		0	172	1.72	95	32.112	32.11	80	70	0	0	0	0	1	1	0		0
No	121	1991	32	1	0		0	175	1.75	80	26.1224	26.12	85	80	1	0	0	0	0	0	0		0.3
No	122	1992	31	1	0		0	175	1.75	80	26.1224	26.12	75	80	1	0	0	0	0	0	0		0.3
No	123	1990	33	1	0		0	184	1.84	81	23.9249	23.92	85	75	1	0	0	0	0	0	0		0.3
No	124	1991	32	1	0		0	175	1.75	78	25.4694	25.47	78	80	1	1	0	0	0	0	0		0.7
No	125	1990	33	1	0		0	172	1.72	70	23.6614	23.66	86	75	1	1	0	0	0	0	0		0.7
No	126	1990	33	1	0		0	183	1.83	86	25.6801	25.68	86	80	1	1	0	0	0	0	0		0.7
No	127	1991	32	1	0		0	177	1.77	104	33.1961	33.2	86	80	1	1	0	0	0	0	0		0.7
No	131	1980	43	1	0		0	178	1.78	83	26.1962	26.2	80	70	0	1	0	0	0	0	0		0.4
No	132	1985	38	1	0		0	173	1.73	94	31.4077	31.41	80	80	1	0	0	0	0	0	0		0.3
No	133	1987	36	1	0		0	179	1.79	94	29.3374	29.34	85	85	0	1	0	0	0	0	0		0.4
No	135	1981	42	1	0		0	175	1.75	85	27.7551	27.76	80	90	0	1	0	0	0	0	0		0.4
No	136	1972	51	1	0		0	175	1.75	110	35.9184	35.92	80	90	0	1	0	0	0	0	0		0.4
No	139	1984	39	1	0		0	182	1.82	105	31.6991	31.7	70	80	0	1	1	0	0	0	0	1	0.7
No	142	1978	45	1	0		0	160	1.6	80	31.25	31.25	70	80	0	1	0	0	0	0	0		0.4
Yes	143	1966	57	2	1	3	1.4	154	1.54	59	24.8777	24.88	112	75	0	0	1	0	0	0	0	2	0.3
Yes	144	1984	39	2	1		0.5	160	1.6	58	22.6562	22.66	135	85	0	0	1	0	0	0	0	2	0.3
Yes	146	1984	39	2	1	3	1.4	164	1.64	75	27.8852	27.89	120	85	0	1	0	0	0	0	0		0.4
No	148	1992	31	2	1	1	0.8	159	1.59	68	26.8977	26.9	68	60	1	1	0	0	0	0	0		0.7
No	149	1983	40	2	1	1	0.8	165	1.65	125	45.9137	45.91	69	70	0	1	0	0	0	0	0		0.4
No	150	1980	43	2	1	1	0.8	165	1.65	125	45.9137	45.91	85	60	0	1	0	0	0	0	0		0.4
No	153	1983	40	2	1	1	0.8	165	1.65	120	44.0771	44.08	67	65	0	1	0	0	0	0	0		0.4
No	156	1965	58	1	0		0	165	1.65	80	29.3848	29.38	66	70	0	0	1	0	0	0	0	1	0.3
No	157	1965	58	1	0		0	165	1.65	80	29.3848	29.38	80	85	0	0	1	0	0	0	0	1	0.3
No	160	1983	40	1	0		0	179	1.79	96	29.9616	29.96	80	75	1	0	0	0	0	0	0		0.3
No	162	1985	38	1	0		0	169	1.69	77	26.9598	26.96	80	80	1	0	0	0	0	0	0		0.3
Yes	163	1957	66	1	0		0	164	1.64	66	24.539	24.54	130	80	1	0	1	0	0	0	0	2	0.6
No	164	1989	34	1	0		0	169	1.69	80	28.0102	28.01	85	85	1	1	0	0	0	0	0		0.7
Yes	165	1972	51	1	0		0	180	1.8	80	24.6914	24.69	120	80	1	1	0	0	0	0	0		0.7
Yes	166	1991	32	1	0		0	157	1.57	65	26.3702	26.37	175	80	1	1	0	0	0	0	0		0.7
No	167	1986	37	1	0		0	165	1.65	77	28.2828	28.28	75	90	1	1	0	0	0	0	0		0.7
No	168	1985	38	1	0		0	170	1.7	81	28.0277	28.03	80	80	0	1	0	0	0	0	0		0.4
No	169	1988	35	1	0		0	172	1.72	92	31.0979	31.1	85	80	0	1	0	0	0	0	0		0.4
No	170	1975	48	1	0		0	167	1.67	65	23.3067	23.31	75	70	0	1	0	0	0	0	0		0.4
No	171	1978	45	1	0		0	182	1.82	96	28.982	28.98	80	80	1	0	0	0	0	0	0		0.3
No	172	1981	42	1	0		0	180	1.8	100	30.8642	30.86	90	80	0	1	0	0	0	0	0		0.4
Yes	173	1985	38	1	0		0	179	1.79	150	46.815	46.82	170	70	0	1	0	0	0	0	0		0.4
No	174	1985	38	1	0		0	179	1.79	78	24.3438	24.34	65	90	0	1	0	0	0	0	0		0.4
No	178	1994	29	2	1	0	0.5	167	1.67	80	28.6851	28.69	90	80	1	1	0	0	0	0	0		0.7
No	179	1985	38	2	1		0.5	160	1.6	71	27.7344	27.73	70	90	1	1	1	0	0	0	0	3	1	1955
Yes	180	1983	40	2	1		0.5	165	1.65	80	29.3848	29.38	150	90	0	0	1	0	0	0	0	2	0.3
No	181	1992	31	2	1		0.5	158	1.58	45	18.026	18.03	70	60	1	0	0	0	0	0	0		0.3
No	182	1990	33	2	1		0.5	159	1.59	51	20.1733	20.17	80	70	1	0	0	0	0	0	0		0.3
No	183	1973	50	2	1		0.5	157	1.57	72	29.2101	29.21	80	70	1	0	0	0	0	0	0		0.3
No	184	1993	30	2	1		0.5	171	1.71	69	23.597	23.6	85	80	1	1	1	0	0	0	0	1	1
Yes	185	1976	47	2	1		0.5	165	1.65	95	34.8944	34.89	170	90	1	1	1	0	0	0	0	1	1
No	186	1984	39	2	1		0.5	156	1.56	59	24.2439	24.24	75	60	1	1	0	0	0	0	0		0.7
No	187	1994	29	2	1		0.5	168	1.68	55	19.487	19.49	80	70	0	1	0	0	0	0	0		0.4
No	188	1972	51	2	1		0.5	165	1.65	80	29.3848	29.38	80	75	0	1	0	0	0	0	0		0.4
No	197	1977	46	2	1	2	1.1	165	1.65	68	24.977	24.98	70	70	1	1	0	0	0	0	0		0.7
No	198	1977	46	2	1	2	1.1	165	1.65	68	24.977	24.98	90	80	1	1	0	0	0	0	0		0.7
No	200	1984	39	2	1	3	1.4	160	1.6	65	25.3906	25.39	85	70	1	0	0	0	0	0	0		0.3
Yes	201	1979	44	2	1	3	1.4	176	1.76	100	32.2831	32.28	165	80	1	1	1	0	0	0	0	2	1
Yes	204	1969	54	2	1	6	2.3	168	1.68	90	31.8878	31.89	155	90	1	0	0	0	0	0	0		0.3
Yes	205	1967	56	2	1	5	2	158	1.58	88	35.2508	35.25	170	80	0	1	0	0	0	0	0		0.4
No	206	1967	56	2	1	7	2.6	158	1.58	90	36.0519	36.05	65	80	1	1	0	0	0	0	0		0.7
No	211	1979	44	2	1	0	0.5	165	1.65	88	32.3232	32.32	80	80	1	0	0	0	0	0	0		0.3
Yes	213	1955	68	1	0		0	175	1.75	105	34.2857	34.29	150	80	1	1	1	0	0	0	0	4	1
Yes	214	1988	35	1	0		0	180	1.8	76	23.4568	23.46	70	90	1	1	0	1	1	1	0		0.7
Yes	215	1984	39	1	0		0	170	1.7	105	36.3322	36.33	145	80	1	0	0	0	0	1	0		0.3
Yes	216	1946	77	1	0		0	165	1.65	80	29.3848	29.38	150	90	1	0	1	0	0	0	0	2	0.6
Yes	217	1975	48	1	0		0	170	1.7	99	34.2561	34.26	180	100	1	1	0	0	0	0	0		0.7
Yes	218	1990	33	1	0		0	185	1.85	120	35.0621	35.06	140	80	1	0	0	1	0	1	0		0.3
Yes	219	1966	57	1	0		0	169	1.69	90	31.5115	31.51	160	80	0	1	1	0	0	0	0	1	0.7
No	220	1995	28	1	0		0	185	1.85	79	23.0825	23.08	65	80	1	0	0	0	0	0	0		0.3
No	221	1994	29	1	0		0	184	1.84	90	26.5832	26.58	90	80	1	1	1	1	1	1	0	2	1
No	222	1999	24	1	0		0	184	1.84	70	20.6758	20.68	90	80	1	0	0	0	0	0	0		0.3
No	223	1986	37	1	0		0	176	1.76	76	24.5351	24.54	80	80	0	1	0	0	0	0	0		0.4
Yes	224	1985	38	1	0		0	170	1.7	120	41.5225	41.52	140	80	1	0	0	1	0	1	0		0.3
Yes	225	1944	79	1	0		0	166	1.66	80	29.0318	29.03	140	90	1	0	0	0	0	0	0		0.3
No	226	1985	38	2	1	6	2.3	156	1.56	70	28.764	28.76	70	80	1	1	0	0	0	0	0		0.7
No	227	1999	24	2	1		0.5	160	1.6	66	25.7812	25.78	85	90	1	1	1	0	0	0	0	2	1
Yes	228	1968	55	1	0		0	170	1.7	90	31.1419	31.14	150	80	1	1	0	0	0	0	0		0.7
No	229	1988	35	2	1		0.5	158	1.58	59	23.634	23.63	75	60	0	1	0	0	0	0	0		0.4
No	230	1994	29	2	1		0.5	171	1.71	82	28.0428	28.04	80	65	0	1	0	0	0	0	0		0.4
Yes	231	1982	41	2	1	3	1.4	156	1.56	88	36.1604	36.16	155	80	1	1	0	0	0	0	0		0.7
Yes	238	1983	40	1	0		0	177	1.77	105	33.5153	33.52	140	80	1	0	1	1	0	0	0	2	0.6
Yes	240	1973	50	1	0		0	174	1.74	109	36.0021	36	160	90	1	1	0	0	0	0	0		0.7
No	244	1994	29	1	0		0	175	1.75	90	29.3878	29.39	90	80	1	1	1	1	1	1	0	2	1
Yes	245	1987	36	1	0		0	165	1.65	100	36.7309	36.73	140	80	1	0	1	0	0	0	0	3	0.6
Yes	246	1970	53	1	0		0	180	1.8	70	21.6049	21.6	150	80	1	1	1	0	0	0	0	1	1
No	247	1998	25	1	0		0	176	1.76	60	19.3698	19.37	75	70	1	1	1	0	0	0	0	3	1
No	248	1995	28	1	0		0	167	1.67	69	24.7409	24.74	85	70	1	0	0	1	0	1	0		0.3
Yes	249	1998	25	1	0		0	180	1.8	180	55.5556	55.56	160	80	1	1	0	1	0	0	0		0.7
No	250	1995	28	1	0		0	175	1.75	73	23.8367	23.84	75	65	1	0	0	0	0	0	0		0.3
Yes	251	1996	27	1	0		0	174	1.74	105	34.6809	34.68	150	60	0	1	1	1	1	0	0	3	0.7
Yes	252	1997	26	1	0		0	166	1.66	90	32.6608	32.66	145	60	1	1	0	0	0	0	0		0.7
No	253	1983	40	1	0		0	181	1.81	98	29.9136	29.91	80	90	1	0	0	0	0	0	0		0.3
Yes	254	1950	73	2	1	7	2.6	156	1.56	50	20.5457	20.55	150	90	1	1	1	0	0	0	0	2	1
Yes	255	1980	43	1	0		0	170	1.7	150	51.9031	51.9	145	80	1	1	0	0	0	0	0		0.7
Yes	256	1980	43	2	1	6	2.3	160	1.6	100	39.0625	39.06	155	70	1	1	1	0	0	0	0	2	1
Yes	257	1990	33	1	0		0	165	1.65	95	34.8944	34.89	150	80	1	1	1	0	0	0	0	2	1
Yes	258	1970	53	1	0		0	170	1.7	65	22.4913	22.49	150	90	1	1	1	0	0	0	0	2	1
Yes	259	1985	38	1	0		0	180	1.8	190	58.642	58.64	180	80	1	1	0	0	0	0	0		0.7
Yes	260	1986	37	2	1	5	2	160	1.6	90	35.1562	35.16	150	80	0	1	0	0	0	0	0		0.4
No	261	1989	34	2	1		0.5	170	1.7	60	20.7612	20.76	80	70	0	1	0	0	0	0	0		0.4	1970
No	262	1999	24	2	1		0.5	163	1.63	67	25.2174	25.22	90	70	1	1	0	0	0	0	0		0.7	1976
No	268	1996	27	1	0		0	180	1.8	86	26.5432	26.54	75	75	1	0	0	0	0	0	0		0.3
No	269	1979	44	1	0		0	175	1.75	80	26.1224	26.12	80	90	1	1	0	0	0	0	0		0.7
No	270	1991	32	1	0		0	183	1.83	89	26.5759	26.58	90	70	1	1	0	1	0	0	0		0.7
No	271	2002	21	1	0		0	168	1.68	65	23.03	23.03	70	75	0	1	1	0	0	0	0	1	0.7
No	272	2005	18	2	1		0.5	165	1.65	62	22.7732	22.77	75	65	1	0	0	0	0	0	0		0.3
No	274	2000	23	2	1		0.5	168	1.68	64	22.6757	22.68	80	65	1	0	1	0	0	0	0	1	0.6
No	275	2000	23	2	1	1	0.8	170	1.7	80	27.6817	27.68	95	70	1	1	1	0	0	0	0	1	1
No	277	1998	25	1	0		0	180	1.8	95	29.321	29.32	95	70	1	1	0	0	0	0	0		0.7
No	278	1994	29	2	1	4	1.7	165	1.65	80	29.3848	29.38	95	70	1	0	1	0	0	0	0	1	0.6
No	280	1985	38	2	1	5	2	168	1.68	85	30.1162	30.12	95	85	1	1	1	0	0	0	0	2	1
No	281	1986	37	1	0		0	185	1.85	75	21.9138	21.91	75	80	1	1	0	0	0	0	0		0.7
No	283	1994	29	2	1		0.5	171	1.71	82	28.0428	28.04	85	75	1	0	0	0	0	0	0		0.3
No	284	1990	33	2	1	1	0.8	168	1.68	68	24.093	24.09	70	75	1	0	0	0	0	0	0		0.3
No	285	1992	31	2	1		0.5	164	1.64	75	27.8852	27.89	85	70	1	0	0	0	0	0	0		0.3
No	290	1978	45	1	0		0	165	1.65	65	23.8751	23.88	80	80	0	1	1	0	0	0	0	2	0.7
No	291	1970	53	1	0		0	170	1.7	78	26.9896	26.99	85	80	1	1	0	0	0	0	0		0.7
No	292	1973	50	1	0		0	174	1.74	94	31.0477	31.05	70	75	1	1	0	0	0	0	0		0.7
No	293	1986	37	1	0		0	174	1.74	84	27.7447	27.74	70	80	1	0	0	0	0	0	0		0.3
No	296	1996	27	1	0		0	174	1.74	81	26.7539	26.75	80	70	1	0	0	0	0	0	0		0.3
No	297	1995	28	1	0		0	167	1.67	72	25.8166	25.82	75	75	1	0	0	0	0	0	0		0.3
No	300	1994	29	1	0		0	179	1.79	80	24.968	24.97	85	75	0	1	0	0	0	0	0		0.4
No	301	1993	30	1	0		0	180	1.8	75	23.1481	23.15	85	80	1	0	0	0	0	0	0		0.3
No	303	1995	28	1	0		0	175	1.75	73	23.8367	23.84	80	85	1	1	0	0	0	0	0		0.7
No	304	1997	26	1	0		0	166	1.66	79	28.6689	28.67	85	70	1	1	0	0	0	0	0		0.7
Yes	305	2000	23	2	1		0.5	156	1.56	80	32.8731	32.87	176	70	1	0	0	0	0	0	0		0.3
No	306	2002	21	2	1		0.5	159	1.59	59	23.3377	23.34	70	60	1	1	0	0	0	0	0		0.7
Yes	307	1975	48	2	1	4	1.7	165	1.65	58	21.3039	21.3	180	80	1	0	0	0	0	0	0		0.3
Yes	308	1947	76	2	1	6	2.3	157	1.57	50	20.2848	20.28	150	70	0	0	1	0	0	0	0	2	0.3
No	309	1989	34	2	1		0.5	168	1.68	75	26.5731	26.57	85	70	1	1	1	0	0	0	0	2	1
Yes	310	1945	78	2	1	7	2.6	155	1.55	50	20.8117	20.81	190	80	0	0	1	0	0	0	0	1	0.3
Yes	311	1949	74	2	1	4	1.7	154	1.54	48	20.2395	20.24	156	80	0	0	1	0	0	0	0		0.3	3
Yes	312	1949	74	1	0		0	168	1.68	65	23.03	23.03	108	80	0	0	1	0	0	0	0	1	0.3
Yes	313	1954	69	1	0		0	169	1.69	70	24.5089	24.51	180	70	0	0	1	0	0	0	0	1	0.3
Yes	314	1975	48	1	0		0	170	1.7	68	23.5294	23.53	185	70	1	1	0	0	0	0	0		0.7
Yes	315	1974	49	1	0		0	175	1.75	70	22.8571	22.86	150	70	1	0	0	0	0	0	0		0.3
No	316	2003	20	2	1		0.5	168	1.68	69	24.4473	24.45	90	75	1	1	0	0	0	0	0		0.7
Yes	317	1968	55	2	1		0.5	166	1.66	60	21.7738	21.77	140	70	0	1	0	0	0	0	0		0.4
Yes	318	1972	51	2	1	5	2	168	1.68	65	23.03	23.03	120	80	1	0	0	0	0	0	0		0.3
Yes	319	1958	65	1	0		0	168	1.68	67	23.7387	23.74	150	75	0	0	1	0	0	0	0	2	0.3
No	320	1988	35	1	0		0	176	1.76	79	25.5036	25.5	70	95	1	1	0	0	0	0	0		0.7
Yes	321	2002	21	1	0		0	170	1.7	85	29.4118	29.41	156	60	1	0	1	0	0	0	0	1	0.6
Yes	322	1980	43	1	0		0	175	1.75	90	29.3878	29.39	160	75	1	0	0	0	0	0	0		0.3
No	323	1989	34	1	0		0	169	1.69	73	25.5593	25.56	85	90	0	1	1	0	0	0	0	1	0.7
Yes	324	1972	51	1	0		0	170	1.7	85	29.4118	29.41	110	85	1	0	0	0	0	0	0		0.3
No	325	1986	37	2	1		0.5	166	1.66	60	21.7738	21.77	80	75	0	0	1	0	0	0	0	1	0.3
Yes	327	1966	57	1	0		0	185	1.85	102	29.8028	29.8	190	80	1	1	1	0	0	0	0	3	1
Yes	328	1966	57	1	0		0	180	1.8	90	27.7778	27.78	200	75	1	0	0	0	0	0	0		0.3
Yes	329	1965	58	1	0		0	183	1.83	71	21.201	21.2	190	80	0	1	0	0	0	0	0		0.4
Yes	330	1958	65	1	0		0	181	1.81	71	21.6721	21.67	130	80	1	1	0	0	0	0	0		0.7
Yes	335	1970	53	2	1		0.5	170	1.7	75	25.9516	25.95	140	75	0	1	0	0	0	0	0		0.4
Yes	336	1964	59	2	1	7	2.6	165	1.65	75	27.5482	27.55	140	90	1	1	0	0	0	0	0		0.7	1958
Yes	337	1964	59	2	1	4	1.7	164	1.64	80	29.7442	29.74	180	80	1	1	0	0	0	0	0		0.7	1938
Yes	338	1964	59	2	1	11	3.8	166	1.66	60	21.7738	21.77	200	95	1	0	0	0	0	0	0		0.3
Yes	339	1954	69	2	1		0.5	160	1.6	65	25.3906	25.39	200	75	0	1	0	1	1	0	0		0.4
Yes	340	1955	68	2	1	6	2.3	165	1.65	75	27.5482	27.55	200	70	0	1	1	1	1	0	0	1	0.7	1930
Yes	341	1972	51	2	1	2	1.1	160	1.6	65	25.3906	25.39	190	70	0	0	1	0	0	0	0	3	0.3	1932
Yes	342	1975	48	2	1	5	2	165	1.65	96	35.2617	35.26	110	75	1	1	1	0	0	0	0	2	1	1950
Yes	343	1983	40	2	1		0.5	170	1.7	95	32.872	32.87	195	75	1	1	1	0	1	0	0	2	1	1951
Yes	344	1970	53	1	0		0	176	1.76	75	24.2123	24.21	160	75	1	1	1	0	0	0	0	2	1	1950
No	345	1988	35	1	0		0	155	1.55	68	28.3039	28.3	70	75	1	1	1	0	0	0	0	4	1
Yes	346	1975	48	2	1	4	1.7	165	1.65	96	35.2617	35.26	120	75	1	1	0	0	0	0	0		0.7
Yes	347	1972	51	2	1		0.5	160	1.6	100	39.0625	39.06	105	75	0	0	1	0	0	0	0	2	0.3	1945
Yes	348	1965	58	1	0		0	170	1.7	85	29.4118	29.41	120	80	0	0	1	0	0	0	0	1	0.3	1945
Yes	349	1970	53	2	1	2	1.1	158	1.58	65	26.0375	26.04	180	95	1	0	0	0	0	0	0		0.3
Yes	350	1957	66	2	1	5	2	162	1.62	55	20.9572	20.96	195	75	1	0	1	0	0	0	0	1	0.6
Yes	351	1981	42	2	1		0.5	162	1.62	55	20.9572	20.96	185	75	0	1	1	0	0	0	0	1	0.7	1957
Yes	352	1962	61	2	1	8	2.9	165	1.65	80	29.3848	29.38	144	80	1	1	1	0	0	0	0	2	1	1932
No	353	1985	38	2	1		0.5	155	1.55	53	22.0604	22.06	70	60	1	0	0	0	0	0	0		0.3	1969
Yes	354	1964	59	2	1		0.5	165	1.65	90	33.0579	33.06	195	70	0	1	0	0	0	0	0		0.4
Yes	355	1967	56	2	1		0.5	167	1.67	120	43.0277	43.03	185	80	1	0	1	0	0	0	0	2	0.6
Yes	356	1973	50	2	1		0.5	165	1.65	95	34.8944	34.89	200	80	1	0	1	0	0	0	0	1	0.6
No	357	1989	34	2	1		0.5	163	1.63	85	31.9922	31.99	90	70	1	0	0	0	0	0	0		0.3	1960
Yes	358	1960	63	2	1		0.5	167	1.67	65	23.3067	23.31	200	85	1	0	1	0	0	0	0	1	0.6
Yes	359	1959	64	2	1	6	2.3	156	1.56	62	25.4767	25.48	140	80	0	1	1	0	0	0	0	1	0.7
Yes	360	1963	60	2	1	4	1.7	160	1.6	85	33.2031	33.2	180	85	0	0	1	0	0	0	0	1	0.3
Yes	361	1967	56	2	1	9	3.2	150	1.5	65	28.8889	28.89	140	70	0	1	0	0	0	0	0		0.4
Yes	362	1961	62	2	1	6	2.3	145	1.45	71	33.7693	33.77	140	80	0	0	1	0	0	0	0	1	0.3
Yes	364	1950	73	2	1	10	3.5	160	1.6	55	21.4844	21.48	125	90	0	0	1	0	0	0	0	2	0.3
Yes	365	1960	63	2	1	10	3.5	165	1.65	90	33.0579	33.06	125	70	0	0	1	0	0	0	0	1	0.3
Yes	366	1971	52	2	1	5	2	170	1.7	80	27.6817	27.68	197	70	0	0	1	0	0	0	0		0.3
Yes	367	1971	52	2	1	7	2.6	158	1.58	60	24.0346	24.03	187	90	1	1	1	0	0	0	0	2	1
Yes	368	1963	60	2	1	0	0.5	165	1.65	55	20.202	20.2	150	80	0	0	1	0	0	0	0	2	0.3
Yes	370	1972	51	2	1	5	2	152	1.52	80	34.626	34.63	200	75	1	0	0	0	0	0	0		0.3
Yes	371	1970	53	2	1	1	0.8	170	1.7	130	44.9827	44.98	130	70	1	0	1	0	0	0	0	1	0.6
Yes	372	1963	60	2	1	9	3.2	160	1.6	80	31.25	31.25	200	80	1	0	0	0	0	0	0		0.3
Yes	373	1960	63	2	1	3	1.4	160	1.6	80	31.25	31.25	140	70	1	0	1	0	0	0	0	2	0.6
Yes	374	1967	56	2	1	6	2.3	155	1.55	82	34.1311	34.13	200	80	1	1	1	0	1	1	0	4	1
Yes	375	1970	53	2	1	4	1.7	165	1.65	84	30.854	30.85	190	70	1	0	1	0	1	1	0	2	0.6
Yes	376	1970	53	2	1	6	2.3	152	1.52	73	31.5963	31.6	200	70	1	1	1	0	0	0	0	1	1
Yes	377	1960	63	2	1	7	2.6	166	1.66	85	30.8463	30.85	190	90	0	0	1	0	0	0	0	1	0.3
Yes	378	1969	54	2	1	8	2.9	160	1.6	75	29.2969	29.3	185	80	0	1	0	0	0	0	0		0.4
Yes	379	1971	52	2	1	5	2	160	1.6	153	59.7656	59.77	60	200	1	1	1	0	1	1	0	2	1
Yes	380	1968	55	2	1	2	1.1	165	1.65	70	25.7117	25.71	190	80	0	1	0	0	0	0	0		0.4
Yes	381	2000	23	1	0		0	180	1.8	100	30.8642	30.86	120	80	1	1	0	0	0	0	0		0.7
No	382	1996	27	1	0		0	180	1.8	79	24.3827	24.38	75	80	0	1	0	0	0	0	0		0.4
Yes	383	1997	26	1	0		0	170	1.7	90	31.1419	31.14	120	80	1	1	0	0	0	0	0		0.7
Yes	384	1987	36	1	0		0	160	1.6	80	31.25	31.25	120	80	1	0	0	0	0	0	0		0.3
Yes	385	1978	45	1	0		0	180	1.8	95	29.321	29.32	120	80	1	1	0	0	0	0	0		0.7
No	386	2004	19	2	1		0.5	168	1.68	70	24.8016	24.8	70	75	1	1	0	0	0	0	0		0.7
Yes	387		54	1	0		0	165	1.65	70	25.7117	25.71	120	70	1	0	0	0	0	0	0		0.3
No	388		28	1	0		0	170	1.7	70	24.2215	24.22	95	70	1	1	0	0	0	0	0		0.7
No	389		57	1	0		0	178	1.78	95	29.9836	29.98	150	70	1	1	0	0	0	0	0		0.7
Yes	390		58	1	0		0	160	1.6	175	68.3594	68.36	68	70	1	1	0	0	0	0	0		0.7
Yes	391		70	2	1	7	2.6	156	1.56	53	21.7784	21.78	120	75	1	1	0	0	0	0	0		0.7
Yes	392		45	2	1		0.5	168	1.68	80	28.3447	28.34	145	70	1	0	0	0	0	0	0		0.3
Yes	393		48	2	1	4	1.7	158	1.58	70	28.0404	28.04	110	75	1	1	0	0	0	0	0		0.7
Yes	394		83	2	1	8	2.9	156	1.56	54	22.1893	22.19	145	80	0	0	1	0	0	0	0	2	0.3
Yes	395		68	1	0		0	170	1.7	68	23.5294	23.53	155	75	1	0	1	0	0	0	0	2	0.6
Yes	396		68	1	0		0	170	1.7	80	27.6817	27.68	160	80	1	1	0	0	0	0	0		0.7
Yes	397		68	2	1	6	2.3	165	1.65	60	22.0386	22.04	185	85	1	0	0	0	0	0	0		0.3
Yes	398		70	2	1	6	2.3	165	1.65	80	29.3848	29.38	155	70	0	1	1	0	0	0	0	2	0.7
Yes	399		64	2	1		0.5	164	1.64	80	29.7442	29.74	150	80	0	1	0	0	0	0	0		0.4
No	400		27	2	1		0.5	160	1.6	60	23.4375	23.44	65	80	1	1	0	0	0	0	0		0.7
Yes	401		70	1	0		0	168	1.68	65	23.03	23.03	150	80	0	0	1	0	0	0	0	2	0.3
Yes	402		63	2	1	6	2.3	165	1.65	63	23.1405	23.14	155	80	0	1	0	0	0	0	0		0.4
Yes	403		59	2	1	6	2.3	165	1.65	63	23.1405	23.14	155	90	0	1	0	0	0	0	0		0.4
Yes	404		56	2	1		0.5	166	1.66	60	21.7738	21.77	150	80	1	1	0	0	0	0	0		0.7
Yes	405		59	2	1	6	2.3	155	1.55	73	30.385	30.39	175	70	1	1	0	0	0	0	0		0.7
Yes	406		54	2	1	3	1.4	166	1.66	70	25.4028	25.4	140	70	1	0	0	0	0	0	0		0.3
Yes	407		42	2	1	5	2	158	1.58	100	40.0577	40.06	200	80	1	1	1	0	0	0	0	1	1
No	408		35	2	1	3	1.4	162	1.62	87	33.1504	33.15	70	60	1	1	1	0	0	0	0		1
No	409		34	2	1	3	1.4	165	1.65	70	25.7117	25.71	85	200	0	1	0	0	0	0	0		0.4
Yes	410		63	2	1	3	1.4	170	1.7	80	27.6817	27.68	150	90	0	1	0	0	0	0	0		0.4
Yes	411		44	2	1		0.5	165	1.65	80	29.3848	29.38	155	80	1	0	0	0	0	0	0		0.3
Yes	412		53	2	1	5	2	158	1.58	60	24.0346	24.03	145	80	1	0	1	0	0	0	0	1	0.6
Yes	413		64	2	1	5	2	165	1.65	60	22.0386	22.04	180	80	1	1	1	0	0	0	0		1
Yes	414		55	2	1		0.5	168	1.68	80	28.3447	28.34	110	80	0	1	0	0	0	0	0		0.4
Yes	415		55	2	1	6	2.3	165	1.65	80	29.3848	29.38	150	80	1	1	0	0	0	0	0		0.7
Yes	416		54	2	1	5	2	165	1.65	70	25.7117	25.71	250	70	1	0	1	1	0	0	0		0.6
Yes	417		54	1	0		0	180	1.8	90	27.7778	27.78	150	90	1	1	0	0	0	0	0		0.7
Yes	418		46	2	1		0.5	159	1.59	80	31.6443	31.64	150	80	1	1	0	0	0	0	0		0.7
Yes	419		65	1	0		0	175	1.75	95	31.0204	31.02	150	80	0	1	1	0	0	0	0	2	0.7
Yes	420		70	2	1	9	3.2	155	1.55	53	22.0604	22.06	150	80	0	0	1	0	0	0	0	2	0.3
Yes	421		50	2	1		0.5	159	1.59	80	31.6443	31.64	160	80	1	0	1	0	0	0	0		0.6
Yes	422		70	2	1	8	2.9	155	1.55	50	20.8117	20.81	180	90	0	0	1	0	0	0	0	2	0.3
No	423	1999	25	1	0		0	180	1.8	75	23.1481	23.15	80	70	1	0	0	0	0	0	0		0.3
No	424	1985	39	1	0		0	180	1.8	80	24.6914	24.69	95	80	0	1	0	0	0	0	0		0.4
No	425	2002	22	1	0		0	175	1.75	75	24.4898	24.49	80	70	1	0	0	0	0	0	0		0.3
Yes	426		73	1	0		0	168	1.68	70	24.8016	24.8	150	90	1	0	0	0	0	0	0		0.3
Yes	427		59	1	0		0	171	1.71	85	29.0688	29.07	150	80	1	1	0	0	0	0	0		0.7
Yes	428		58	2	1	5	2	161	1.61	80	30.863	30.86	150	80	1	1	0	0	0	0	0		0.7
Yes	429		50	2	1		0.5	155	1.55	85	35.3798	35.38	145	75	1	0	0	0	0	0	0		0.3
Yes	430		50	2	1	4	1.7	167	1.67	80	28.6851	28.69	180	80	0	1	1	0	0	0	0	1	0.7
Yes	431		60	1	0		0	170	1.7	95	32.872	32.87	180	80	1	1	1	0	0	0	0	2	1
Yes	432		53	2	1	5	2	158	1.58	53	21.2306	21.23	150	80	1	1	1	0	0	0	0	2	1
Yes	433		55	2	1	5	2	160	1.6	85	33.2031	33.2	150	80	1	1	1	0	0	0	0		1
No	434		18	1	0		0	170	1.7	60	20.7612	20.76	85	65	1	1	1	0	0	0	0		1
No	435		37	2	1	2	1.1	165	1.65	75	27.5482	27.55	80	75	1	1	1	0	0	0	0	1	1
Yes	436		65	2	1	5	2	158	1.58	56	22.4323	22.43	150	80	1	1	1	0	0	0	0	2	1
Yes	437		60	1	0		0	170	1.7	68	23.5294	23.53	180	80	1	1	1	0	0	0	0		1
Yes	438		32	1	0		0	180	1.8	95	29.321	29.32	150	80	1	1	1	0	0	0	0		1
Yes	439		67	1	0		0	168	1.68	67	23.7387	23.74	180	80	1	1	1	0	0	0	0		1
No	440		35	1	0		0	180	1.8	79	24.3827	24.38	85	85	1	1	1	0	0	0	0	1	1
Yes	441		60	2	1	6	2.3	160	1.6	58	22.6562	22.66	150	70	1	1	1	0	0	0	0		1
No	442		35	2	1	2	1.1	159	1.59	69	27.2932	27.29	80	80	1	1	1	0	0	0	0	2	1
No	445		25	1	0		0	170	1.7	75	25.9516	25.95	90	80	1	1	1	0	0	0	0	2	1
Yes	446		54	1	0		0	170	1.7	80	27.6817	27.68	130	80	1	1	1	0	0	0	0	5	1
Yes	448	1944	80	1	0		0	165	1.65	68	24.977	24.98	100	80	1	0	0	0	0	0	0		0.3
Yes	449	1963	61	1	0		0	169	1.69	70	24.5089	24.51	140	80	1	0	0	0	0	0	0		0.3
No	450	1970	54	1	0		0	180	1.8	93	28.7037	28.7	80	80	0	0	1	0	0	0	0	1	0.3	1944
Yes	451		47	1	0		0	165	1.65	98	35.9963	36	185	80	1	1	1	0	0	0	0	1	1
Yes	453		42	1	0		0	178	1.78	85	26.8274	26.83	105	70	1	1	0	0	0	0	0		0.7
No	454		47	1	0		0	178	1.78	82	25.8806	25.88	98	80	0	0	1	0	0	0	0	2	0.3
No	458		25	1	0		0	170	1.7	75	25.9516	25.95	85	80	0	1	1	0	0	0	0	2	0.7
Yes	459		51	1	0		0	170	1.7	80	27.6817	27.68	80	80	1	1	0	0	0	0	0		0.7
Yes	463		43	1	0		0	178	1.78	90	28.4055	28.41	105	70	1	1	0	0	0	0	0		0.7
No	501	1989	35	2	1	2	1.1	170	1.7	80	27.6817	27.68	95	80	0	0	0	1	1	0	0		0	1964
Yes	502	1964	60	2	1		0.5	162	1.62	89	33.9125	33.91	112	80	0	0	1	0	0	0	0	2	0.3	1940
Yes	503		73	2	1	2	1.1	167	1.67	80	28.6851	28.69	130	120	0	1	0	0	0	0	0		0.4
No	504	1992	31	2	1		0.5	165	1.65	70	25.7117	25.71	90	70	1	1	0	0	1	1	0		0.7	1969
Yes	505	1969	55	2	1	10	3.5	163	1.63	60	22.5827	22.58	203	60	0	1	0	0	1	0	0		0.4	1945
Yes	506	1974	50	2	1	4	1.7	159	1.59	84	33.2265	33.23	188	95	1	1	0	1	0	1	0		0.7	1940
Yes	507	1959	65	2	1	7	2.6	164	1.64	76	28.257	28.26	120	80	1	1	0	0	0	1	0		0.7	1936
Yes	508		53	1	0		0	171	1.71	79	27.0169	27.02	120	70	1	1	0	0	0	0	0		0.7
Yes	509	1962	61	2	1	4	1.7	160	1.6	67	26.1719	26.17	110	80	1	0	0	0	0	0	0		0.3	1938
Yes	510	1981	42	2	1	6	2.3	165	1.65	78	28.6501	28.65	100	80	0	1	0	0	0	0	0		0.4	1959
No	511	1980	44	1	0		0	184	1.84	120	35.4442	35.44	125	100	1	1	1	1	1	0	0	1	1	1958
Yes	512	1992	32	2	1	3	1.4	168	1.68	65	23.03	23.03	150	60	1	1	0	0	0	0	0		0.7	1960
No	514	1999	25	1	0		0	166	1.66	64	23.2254	23.23	75	70	1	0	0	0	0	0	0		0.3	1964
Yes	516	1979	45	1	0		0	181	1.81	85	25.9455	25.95	160	65	1	0	0	0	0	0	0		0.3	1945
Yes	517	1968	56	1	0		0	172	1.72	80	27.0416	27.04	135	70	0	1	1	0	0	0	0	3	0.7	1945
Yes	518	1969	55	2	1		0.5	158	1.58	103	41.2594	41.26	93	85	1	1	1	0	0	0	0	2	1	1952
Yes	519	1960	64	1	0		0	175	1.75	110	35.9184	35.92	203	80	0	1	1	0	0	0	0	3	0.7
Yes	520	1965	59	1	0		0	173	1.73	86	28.7347	28.73	196	80	0	0	1	0	0	0	0	1	0.3	1942
Yes	521	1951	73	1	0		0	173	1.73	75	25.0593	25.06	140	70	0	0	1	0	0	0	0	5	0.3
Yes	522	1963	54	2	1	5	2	156	1.56	79	32.4622	32.46	100	80	1	0	0	0	0	0	0		0.3
Yes	523	1952	72	2	1	7	2.6	156	1.56	88	36.1604	36.16	192	80	0	1	1	0	0	0	0	2	0.7
No	526	1986	38	1	0		0	171	1.71	76	25.9909	25.99	70	80	1	1	0	0	0	0	0		0.7	1962
Yes	527	1979	45	1	0		0	171	1.71	82	28.0428	28.04	130	80	0	0	1	0	0	0	0	1	0.3	1960
Yes	528	1951	73	1	0		0	168	1.68	85	30.1162	30.12	75	80	0	1	0	0	0	0	0		0.4
Yes	530	1979	44	2	1	4	1.7	155	1.55	98	40.7908	40.79	170	80	1	1	0	0	0	0	0		0.7	1959
Yes	535	1960	64	2	1	4	1.7	163	1.63	83	31.2394	31.24	115	80	0	1	1	0	0	0	0	2	0.7
Yes	536	1957	67	2	1	4	1.7	165	1.65	100	36.7309	36.73	120	80	0	0	1	0	0	0	0	4	0.3
Yes	537	1988	36	2	1		0.5	166	1.66	64	23.2254	23.23	250	90	0	0	1	0	0	0	0	1	0.3	1960
Yes	538	1983	40	2	1	1	0.8	153	1.53	77	32.8933	32.89	200	80	0	1	0	1	0	0	0		0.4	1961
Yes	539	1982	42	2	1	2	1.1	162	1.62	95	36.1988	36.2	176	60	1	1	0	0	0	0	0		0.7	1961
Yes	540	1974	50	2	1		0.5	154	1.54	72	30.3593	30.36	242	75	1	1	1	1	1	1	0	3	1
No	541	1987	37	1	0		0	168	1.68	67	23.7387	23.74	80	85	1	0	0	0	1	1	0		0.3	1964
Yes	542	1962	62	1	0		0	166	1.66	90	32.6608	32.66	151	85	1	0	1	0	0	1	0	2	0.6	1939
Yes	543	1977	47	2	1	5	2	165	1.65	80	29.3848	29.38	135	80	0	1	1	0	0	0	0	3	0.7
Yes	569	1950	66	2	1	5	2	145	1.45	64	30.44	30.44	146	70	0	1	0	0	0	0	0		0.4	1940
Yes	570	1954	70	1	0		0	165	1.65	85	31.2213	31.22	179	100	0	1	0	0	0	0	0		0.4	1934
Yes	572	1968	56	2	1	3	1.4	162	1.62	85	32.3884	32.39	130	69	0	0	1	0	1	0	0	1	0.3	1932
Yes	573	1968	56	2	1	3	1.4	162	1.62	85	32.3884	32.39	138	69	0	1	1	0	1	0	0	1	0.7	1932
Yes	574	1982	42	2	1	1	0.8	164	1.64	85	31.6032	31.6	120	60	1	1	0	0	0	0	0		0.7	1955
No	575	1990	34	2	1		0.5	157	1.57	68	27.5873	27.59	85	69	1	1	1	1	1	1	0	2	1	1960
No	576	1989	34	2	1		0.5	166	1.66	66	23.9512	23.95	75	75	1	1	1	0	0	1	0	2	1	1960
Yes	577	1966	58	2	1	2	1.1	156	1.56	88	36.1604	36.16	89	100	1	1	0	0	1	1	0		0.7	1935
Yes	578	1967	57	2	1	6	2.3	157	1.57	50	20.2848	20.28	85	69	0	0	0	0	1	0	0		0	1930
Yes	580	1963	61	2	1	6	2.3	158	1.58	81	32.4467	32.45	143	85	0	0	1	0	0	0	0	5	0.3
Yes	581	1971	53	2	1	4	1.7	157	1.57	75	30.4272	30.43	201	75	0	1	1	0	0	0	0	3	0.7
Yes	582	1963	61	1	0		0	164	1.64	74	27.5134	27.51	123	67	0	1	1	0	0	0	0	2	0.7
Yes	583	1957	57	2	1	4	1.7	162	1.62	60	22.8624	22.86	143	80	0	0	0	0	0	0	0		0
Yes	584	1945	79	1	0		0	162	1.62	99	37.7229	37.72	167	66	0	1	0	0	0	0	0		0.4
Yes	585	1985	39	1	0		0	162	1.62	75	28.578	28.58	123	70	0	0	0	0	0	0	0		0	1960
Yes	586	1955	69	2	1	5	2	169	1.69	94	32.912	32.91	203	70	0	0	1	0	0	0	0	2	0.3
Yes	587	1954	70	2	1	5	2	165	1.65	79	29.0174	29.02	117	80	0	0	1	0	0	0	0	3	0.3
Yes	588	1968	56	1	0		0	166	1.66	72	26.1286	26.13	150	80	1	0	1	0	0	0	0	1	0.6
No	589	2003	21	2	1		0.5	166	1.66	64	23.2254	23.23	65	70	0	0	1	0	0	0	0	1	0.3	1969
Yes	590		60	2	1	9	3.2	164	1.64	80	29.7442	29.74	140	70	1	1	1	0	0	0	0	2	1
Yes	591		49	2	1	8	2.9	166	1.66	80	29.0318	29.03	155	75	1	0	1	1	1	1	0		0.6
Yes	592		60	2	1	5	2	159	1.59	55	21.7555	21.76	200	75	1	0	0	0	0	0	0		0.3
Yes	593		55	2	1	4	1.7	170	1.7	58	20.0692	20.07	200	85	1	1	0	0	0	0	0		0.7
Yes	594		52	1	0		0	163	1.63	80	30.1103	30.11	230	95	0	1	1	0	0	0	0		0.7
Yes	595		51	1	0		0	177	1.77	88	28.089	28.09	235	90	0	1	1	0	0	0	0		0.7
Yes	596		66	1	0		0	176	1.76	68	21.9525	21.95	175	60	1	0	1	0	0	0	0		0.6
Yes	597		62	1	0		0	175	1.75	65	21.2245	21.22	185	75	0	1	0	0	0	0	0		0.4
Yes	598		70	1	0		0	170	1.7	62	21.4533	21.45	195	70	1	1	0	0	0	0	0		0.7
Yes	599		40	1	0		0	180	1.8	99	30.5556	30.56	135	85	0	1	0	0	0	0	0		0.4
Yes	600		66	1	0		0	177	1.77	88	28.089	28.09	155	70	1	0	0	1	1	1	0		0.3
Yes	700		51	1	0		0	180	1.8	70	21.6049	21.6	130	70	1	1	1	1	1	1	0		1
Yes	701		51	1	0		0	182	1.82	71	21.4346	21.43	135	75	1	1	1	1	1	1	0		1
Yes	702		51	1	0		0	182	1.82	68	20.5289	20.53	140	80	1	1	1	1	1	1	0		1
Yes	703		51	1	0		0	177	1.77	68	21.7051	21.71	145	85	1	1	1	1	1	1	0		1
Yes	704		52	1	0		0	173	1.73	66	22.0522	22.05	150	90	1	1	0	1	1	1	0		0.7
Yes	705		52	1	0		0	182	1.82	100	30.1896	30.19	135	95	1	1	0	1	1	1	0		0.7
Yes	706		54	1	0		0	175	1.75	99	32.3265	32.33	140	100	1	1	0	1	1	1	0		0.7
Yes	707		54	1	0		0	177	1.77	70	22.3435	22.34	145	100	1	1	0	1	1	1	0		0.7
Yes	708		55	1	0		0	180	1.8	100	30.8642	30.86	150	95	1	1	0	1	1	1	0		0.7
Yes	709		55	1	0		0	183	1.83	68	20.3052	20.31	155	90	1	1	0	1	1	1	0		0.7
Yes	710		55	1	0		0	180	1.8	69	21.2963	21.3	160	85	1	1	0	1	1	1	0		0.7
Yes	711		56	1	0		0	178	1.78	68	21.4619	21.46	165	80	1	1	0	1	1	1	0		0.7
Yes	712		56	1	0		0	175	1.75	67	21.8776	21.88	170	75	1	1	0	1	1	1	0		0.7
Yes	713		57	1	0		0	177	1.77	100	31.9193	31.92	175	70	1	1	0	1	1	1	0		0.7
Yes	714		57	1	0		0	174	1.74	88	29.0659	29.07	180	65	1	1	0	1	1	1	0		0.7
Yes	715		57	1	0		0	176	1.76	92	29.7004	29.7	145	65	0	1	0	1	1	1	0		0.4
Yes	716		58	1	0		0	174	1.74	90	29.7265	29.73	150	70	0	1	1	1	1	1	0		0.7
Yes	717		58	1	0		0	176	1.76	67	21.6296	21.63	155	75	0	1	1	1	1	1	0		0.7
Yes	718		59	1	0		0	178	1.78	100	31.5617	31.56	160	80	0	1	1	1	1	1	0		0.7
Yes	719		59	1	0		0	177	1.77	88	28.089	28.09	165	85	0	1	1	1	1	1	0		0.7
Yes	720		59	1	0		0	181	1.81	90	27.4717	27.47	170	75	0	1	1	1	1	1	0		0.7
Yes	721		60	1	0		0	176	1.76	87	28.0863	28.09	175	80	0	1	1	1	1	1	0		0.7
Yes	722		60	1	0		0	173	1.73	93	31.0735	31.07	180	80	0	1	1	1	1	1	0		0.7
Yes	723		61	1	0		0	177	1.77	90	28.7274	28.73	185	80	0	1	1	1	1	1	0		0.7
Yes	724		61	1	0		0	176	1.76	94	30.3461	30.35	190	80	0	1	1	0	1	1	0		0.7
Yes	725		61	1	0		0	178	1.78	70	22.0932	22.09	155	80	0	1	1	0	1	1	0		0.7
Yes	726		62	1	0		0	176	1.76	87	28.0863	28.09	160	75	1	1	1	0	1	1	0		1
Yes	727		62	1	0		0	177	1.77	90	28.7274	28.73	165	80	1	1	1	0	1	1	0		1
Yes	728		62	1	0		0	176	1.76	88	28.4091	28.41	170	80	1	1	1	0	1	1	0		1
Yes	729		62	1	0		0	170	1.7	90	31.1419	31.14	175	80	1	1	1	0	1	1	0		1
Yes	730		62	1	0		0	177	1.77	70	22.3435	22.34	180	80	1	1	1	0	1	1	0		1
Yes	731		62	1	0		0	178	1.78	71	22.4088	22.41	185	70	0	1	1	0	1	1	0		0.7
Yes	732		62	1	0		0	177	1.77	68	21.7051	21.71	190	70	0	1	1	0	1	1	0		0.7
Yes	733		62	1	0		0	180	1.8	68	20.9877	20.99	195	70	0	1	1	0	1	1	0		0.7
Yes	734		62	1	0		0	176	1.76	70	22.5981	22.6	200	70	0	1	1	0	1	1	0		0.7
Yes	735		63	1	0		0	168	1.68	98	34.7222	34.72	200	70	0	1	1	0	1	1	0		0.7
Yes	736		63	1	0		0	179	1.79	70	21.847	21.85	200	70	0	1	1	0	1	1	0		0.7
Yes	737		64	1	0		0	176	1.76	70	22.5981	22.6	200	70	0	1	1	0	1	1	0		0.7
Yes	738		65	1	0		0	170	1.7	92	31.8339	31.83	125	85	0	1	0	0	1	1	0		0.4
Yes	739		66	1	0		0	172	1.72	89	30.0838	30.08	130	70	0	1	0	0	1	1	0		0.4
Yes	740		66	1	0		0	180	1.8	71	21.9136	21.91	135	70	0	1	0	0	1	1	0		0.4
Yes	741		66	1	0		0	173	1.73	89	29.737	29.74	140	70	0	1	0	0	1	1	0		0.4
Yes	742		66	1	0		0	176	1.76	90	29.0548	29.05	145	70	0	1	0	0	1	1	0		0.4
Yes	743		66	1	0		0	177	1.77	70	22.3435	22.34	150	70	0	1	0	0	1	1	0		0.4
Yes	744		67	1	0		0	171	1.71	90	30.7787	30.78	155	85	0	1	0	0	1	1	0		0.4
Yes	745		69	1	0		0	169	1.69	67	23.4586	23.46	160	90	0	1	0	0	1	1	0		0.4
Yes	746		70	1	0		0	168	1.68	68	24.093	24.09	165	90	0	1	0	0	1	1	0		0.4
Yes	747		70	1	0		0	170	1.7	67	23.1834	23.18	170	90	0	1	0	0	1	1	0		0.4
Yes	748		70	1	0		0	170	1.7	68	23.5294	23.53	140	90	0	1	0	0	1	1	0		0.4
Yes	749		70	1	0		0	168	1.68	66	23.3844	23.38	135	90	0	1	0	0	1	1	0		0.4
Yes	750		50	2	1		0.5	168	1.68	70	24.8016	24.8	130	75	1	0	0	0	1	1	0		0.3
Yes	751		51	2	1	7	2.6	167	1.67	66	23.6652	23.67	125	75	1	0	0	0	1	1	0		0.3
Yes	752		52	2	1	4	1.7	166	1.66	60	21.7738	21.77	120	75	1	0	0	0	1	1	0		0.3
Yes	753		53	2	1	6	2.3	165	1.65	60	22.0386	22.04	115	75	1	0	0	0	1	1	0		0.3
Yes	754		54	2	1	7	2.6	164	1.64	59	21.9363	21.94	110	75	1	0	0	0	1	1	0		0.3
Yes	755		55	2	1	2	1.1	163	1.63	52	19.5717	19.57	130	80	1	0	0	0	1	1	0		0.3
Yes	756		56	2	1	7	2.6	162	1.62	53	20.1951	20.2	145	80	1	0	0	0	1	1	0		0.3
Yes	757		57	2	1	4	1.7	161	1.61	54	20.8325	20.83	165	80	0	1	0	0	1	1	0		0.4
Yes	758		58	2	1		0.5	160	1.6	55	21.4844	21.48	170	80	0	1	0	0	1	1	0		0.4
Yes	759		59	2	1		0.5	159	1.59	56	22.151	22.15	180	90	0	1	0	0	1	1	0		0.4
Yes	760		60	2	1		0.5	162	1.62	57	21.7193	21.72	190	80	0	1	0	0	1	1	0		0.4
Yes	761		61	2	1	4	1.7	161	1.61	80	30.863	30.86	185	80	0	1	0	0	1	1	0		0.4
Yes	762		62	2	1	6	2.3	160	1.6	59	23.0469	23.05	180	80	0	1	0	0	1	1	0		0.4
Yes	763		63	2	1	4	1.7	159	1.59	50	19.7777	19.78	175	80	0	1	0	0	1	1	0		0.4
Yes	764		64	2	1	3	1.4	162	1.62	61	23.2434	23.24	170	80	0	1	1	0	1	1	0		0.7
Yes	765		65	2	1	7	2.6	161	1.61	62	23.9188	23.92	165	80	0	1	1	0	1	1	0		0.7
Yes	766		66	2	1	3	1.4	160	1.6	63	24.6094	24.61	160	80	0	1	1	0	1	1	0		0.7
Yes	767		67	2	1		0.5	159	1.59	80	31.6443	31.64	155	80	0	1	1	0	1	1	0		0.7
Yes	768		68	2	1	8	2.9	160	1.6	55	21.4844	21.48	150	80	1	0	1	0	1	1	0		0.6
Yes	769		69	2	1	5	2	159	1.59	50	19.7777	19.78	145	80	1	0	1	0	1	1	0		0.6
Yes	770		70	2	1	6	2.3	158	1.58	51	20.4294	20.43	200	80	1	0	1	0	1	1	0		0.6
Yes	771		71	2	1	7	2.6	157	1.57	52	21.0962	21.1	130	80	1	0	1	0	1	1	0		0.6
Yes	772		72	2	1	4	1.7	156	1.56	53	21.7784	21.78	135	80	1	0	1	0	1	1	0		0.6
Yes	773		73	2	1	5	2	155	1.55	54	22.4766	22.48	140	80	1	0	1	0	1	1	0		0.6
Yes	774		74	2	1	7	2.6	154	1.54	55	23.1911	23.19	145	90	1	0	1	0	1	1	0		0.6
Yes	775		75	2	1	6	2.3	156	1.56	51	20.9566	20.96	150	80	1	0	1	0	1	1	0		0.6
Yes	776		76	2	1	5	2	155	1.55	51	21.2279	21.23	155	80	1	0	1	0	1	1	0		0.6
Yes	777		77	2	1	5	2	154	1.54	58	24.4561	24.46	160	80	1	0	1	0	1	1	0		0.6
Yes	778		70	2	1	4	1.7	156	1.56	59	24.2439	24.24	165	75	1	0	1	0	1	0	0		0.6
Yes	779		69	2	1	10	3.5	155	1.55	50	20.8117	20.81	170	75	1	0	1	0	1	0	0		0.6
Yes	780		68	2	1	6	2.3	154	1.54	61	25.721	25.72	175	75	1	0	1	0	1	0	0		0.6
Yes	781		67	2	1		0.5	160	1.6	54	21.0937	21.09	180	75	1	0	1	0	1	0	0		0.6
Yes	782		66	2	1		0.5	161	1.61	80	30.863	30.86	185	75	1	0	1	0	1	0	0		0.6
Yes	783		65	2	1		0.5	162	1.62	64	24.3865	24.39	130	75	1	0	1	0	1	0	0		0.6
Yes	784		64	2	1		0.5	163	1.63	65	24.4646	24.46	135	75	1	0	1	0	1	0	0		0.6
Yes	785		63	2	1		0.5	164	1.64	66	24.539	24.54	125	70	1	0	1	0	0	0	0		0.6
Yes	786		62	2	1	6	2.3	165	1.65	80	29.3848	29.38	145	70	1	0	1	0	0	0	0		0.6
Yes	787		61	2	1	8	2.9	166	1.66	60	21.7738	21.77	200	70	1	0	1	0	0	0	0		0.6
Yes	788		60	2	1	5	2	167	1.67	60	21.5139	21.51	200	70	1	0	1	0	0	0	0		0.6
Yes	789		59	2	1	8	2.9	164	1.64	59	21.9363	21.94	150	70	1	0	1	0	0	0	0		0.6
Yes	790		58	2	1		0.5	165	1.65	55	20.202	20.2	155	70	1	0	1	0	0	0	0		0.6
Yes	791		57	2	1	5	2	166	1.66	57	20.6852	20.69	160	70	1	0	1	0	0	0	0		0.6
Yes	792		56	2	1		0.5	167	1.67	51	18.2868	18.29	165	80	1	0	1	0	0	0	0		0.6
Yes	793		55	2	1	8	2.9	164	1.64	55	20.4491	20.45	170	80	1	0	1	0	0	0	0		0.6
Yes	794		54	2	1	5	2	165	1.65	54	19.8347	19.83	175	90	1	0	1	0	0	0	0		0.6
Yes	795		53	2	1	4	1.7	166	1.66	80	29.0318	29.03	150	80	1	0	1	0	0	0	0		0.6
Yes	796		52	2	1	5	2	167	1.67	52	18.6453	18.65	155	80	1	0	1	0	0	0	0		0.6
Yes	797		51	2	1	4	1.7	168	1.68	51	18.0697	18.07	150	85	1	0	1	0	0	0	0		0.6
Yes	798		50	2	1	5	2	169	1.69	50	17.5064	17.51	160	80	1	0	1	0	0	0	0		0.6
Yes	799		49	2	1	5	2	170	1.7	49	16.955	16.96	165	90	1	0	1	0	0	0	0		0.6
Yes	800		66	1	0		0	177	1.77	70	22.3435	22.34	140	80	1	1	1	0	0	0	0		1
Yes	801		77	1	0		0	170	1.7	66	22.8374	22.84	155	70	1	0	1	0	0	0	0		0.6
Yes	802		70	1	0		0	173	1.73	68	22.7204	22.72	145	70	0	1	1	0	0	0	0		0.7
Yes	803		59	1	0		0	176	1.76	70	22.5981	22.6	165	90	0	1	0	0	0	0	0		0.4
Yes	804		60	2	1	8	2.9	166	1.66	55	19.9594	19.96	130	95	1	0	1	0	0	0	0		0.6
Yes	805		60	2	1		0.5	163	1.63	56	21.0772	21.08	155	85	1	1	1	0	0	0	0		1
Yes	806		70	2	1	9	3.2	160	1.6	57	22.2656	22.27	150	80	0	1	1	0	0	0	0		0.7
